# Supplementary material for: RNA Sequencing and Proteogenomics Reveal the Importance of Leaderless mRNAs in the Radiation-Tolerant Bacterium Deinococcus deserti
Source: PubMed Central journal article supplement — Genome Biol Evol. 2014 Apr 10;6(4):932–48. doi: 10.1093/gbe/evu069 (PMC4007540; doi:10.1093/gbe/evu069), 2014-04-10

## Supplementary Figures

(for “RNA Sequencing and Proteogenomics Reveal the Importance of Leaderless mRNAs in the Radiation-tolerant Bacterium *Deinococcus deserti*” by de Groot *et al.*)

### Contents:

|                                                                                                               | <b>Pages</b> |
|---------------------------------------------------------------------------------------------------------------|--------------|
| Figure S1 Codon usage of leaderless and leadered genes                                                        | 2            |
| Figure S2 Amino acid composition of leaderless and leadered gene products                                     | 3            |
| Figure S3 Read coverage of a region with leaderless <i>clpP</i> and leadered <i>lon</i>                       | 4            |
| Figure S4 Start codon re-annotations of DNA repair genes in <i>D. deserti</i>                                 | 5-9          |
| Figure S5 Examples of predicted start codon corrections in Deinococcal homologs of <i>D. deserti</i> proteins | 10-13        |
| Figure S6 Detected homologs for peptides and proteins from 17 new leaderless transcripts                      | 14-23        |
| Figure S7 New proteins detected by proteomics                                                                 | 24-29        |
| Figure S8 Examples of several highly induced genes encoding small proteins                                    | 30-35        |
| Figure S9 TSS positions relative to RDRM (radiation-desiccation response motif).                              | 36           |

**Figure S1. Codon usage of leaderless and leadered genes.** Relative synonymous codon usage (RSCU) is shown for the 1174 leaderless genes (339156 codons) and 784 leadered genes (277460 codons). RSCU values are the number of times a particular codon is observed, relative to the number of times that the codon would be observed for a uniform synonymous codon usage.

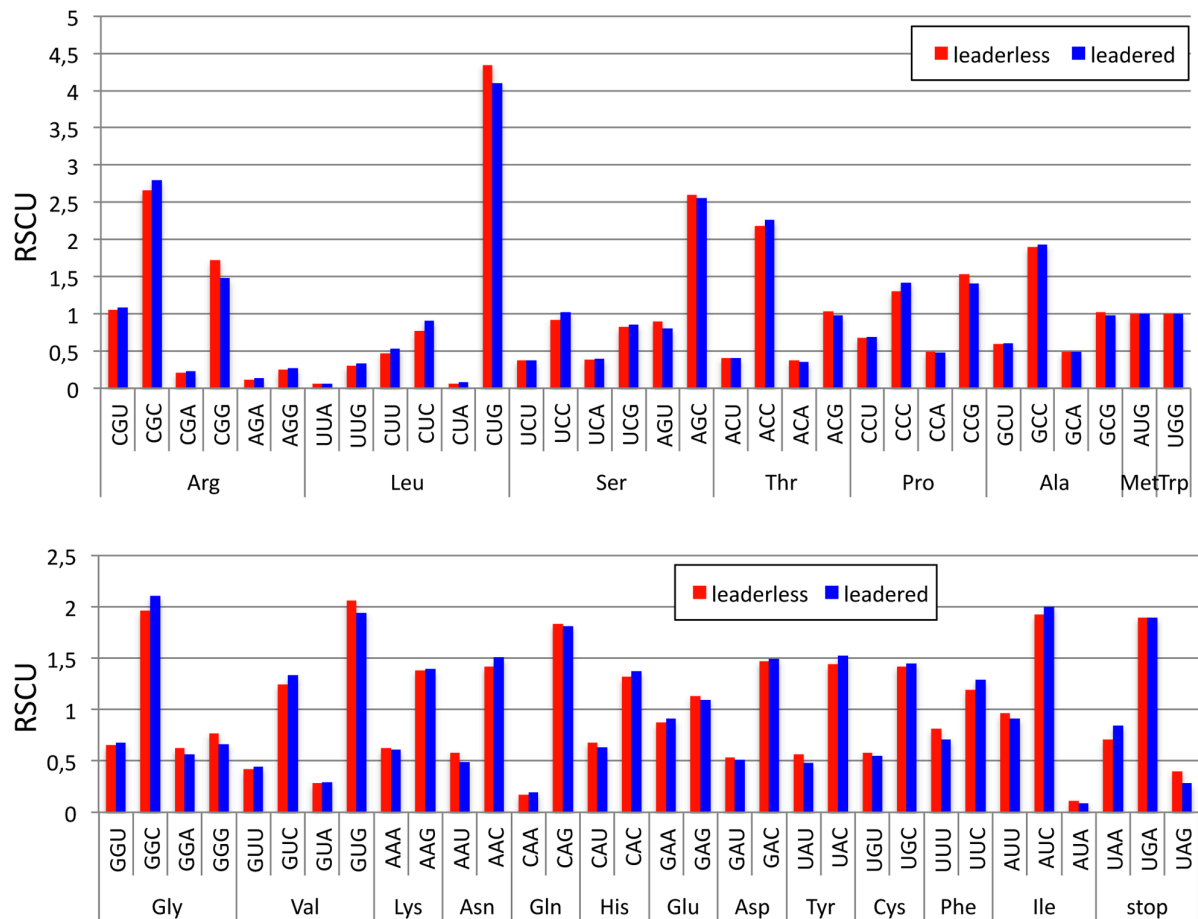

**Figure S2. Amino acid composition of leaderless and leadered gene products.** The average amino acid composition, in percentages, is indicated for the products of the 1174 leaderless genes (337982 residues) and 784 leadered genes (276676 residues).

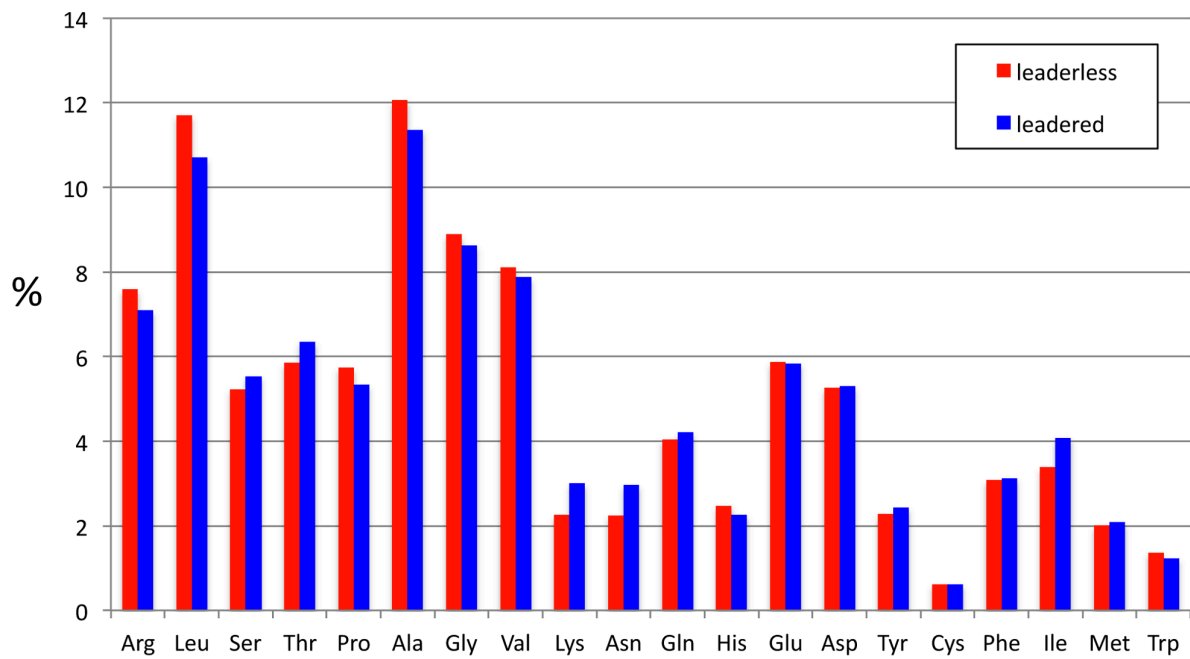

**Figure S3. Read coverage of a region with leaderless *clpP* and leadered *lon*.** The proteases ClpP (Deide\_19570, Clp protease proteolytic subunit) and Lon (Deide\_19590, Lon protease) are produced from leaderless and leadered mRNA, respectively. Coverage (in blue) of reads that map to the forward genomic DNA strand is shown above the genes (results in non-irradiated and irradiated samples were similar for these genes; only RD19 IR and RD19 IR + TEX samples are shown). Panels B-D are zoomed parts of the region shown in panel A. Transcription start sites (TSSs) for *clpP* and *lon* are indicated with arrows in panels B and C, respectively. Panel D is a zoom at the translation initiation codon of *lon*. Start codons, -10 motifs (upstream of TSSs) and SD sequence (upstream of start codon in leadered *lon* mRNA) are boxed. Treatment (+) or not (-) of RNA with TEX is indicated.

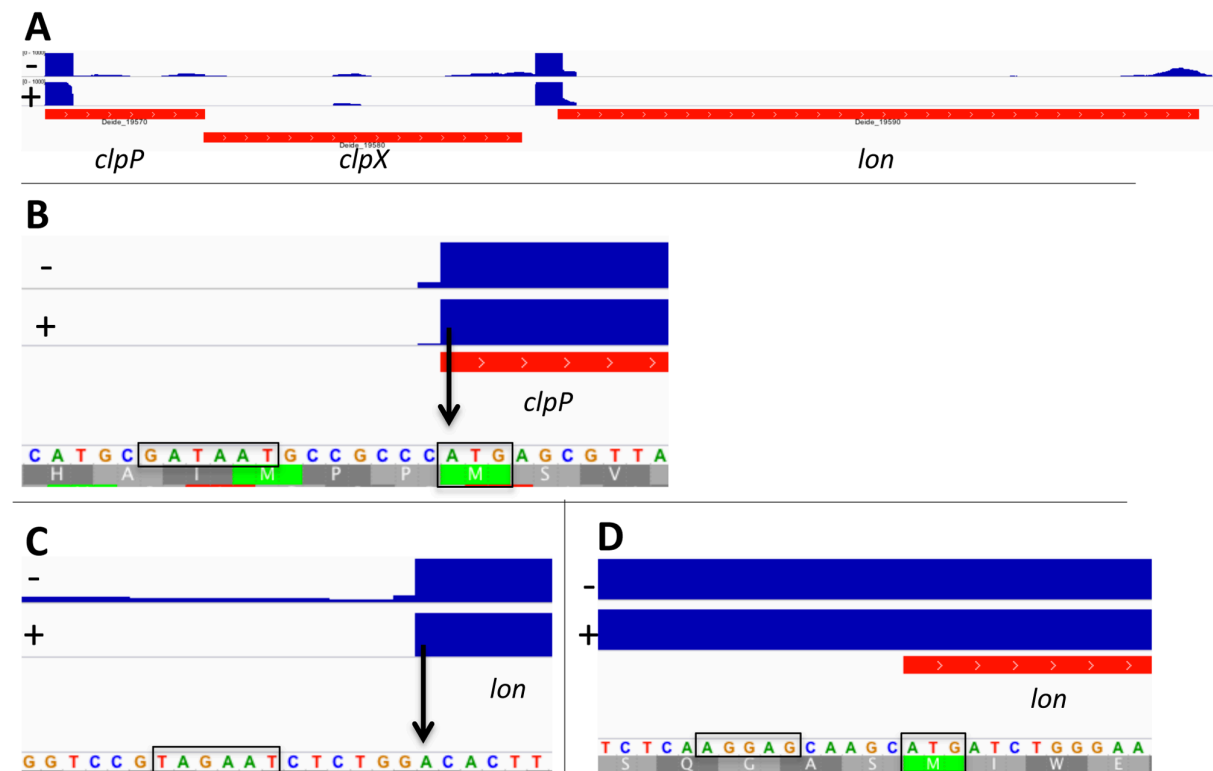

**Figure S4. Start codon re-annotations of DNA repair genes in *D. deserti*.** RNA-seq read coverage for *uvrA2* (*Deide\_2p02060*), *recN* (*Deide\_12310*), *rarA* (*Deide\_04980*), *ruvA* (*Deide\_09360*), *ruvC* (*Deide\_20630*) is shown. Coverage (in blue) of reads that map to the forward genomic DNA strand is shown above the genes, and those on the reverse strand below the genes (independent of gene annotation and orientation). Above and below the genes, the order of the samples is: RD19 NI, RD19 NI +TEX, RD19 IR, RD19 IR +TEX. In each figure, the maximum height to show coverage is set at the same value for each sample (= in all 8 “lines”), but this value can be different between the figures. New start codons and -10 motifs are boxed.

## Deide\_2p02060 (UvrA2)

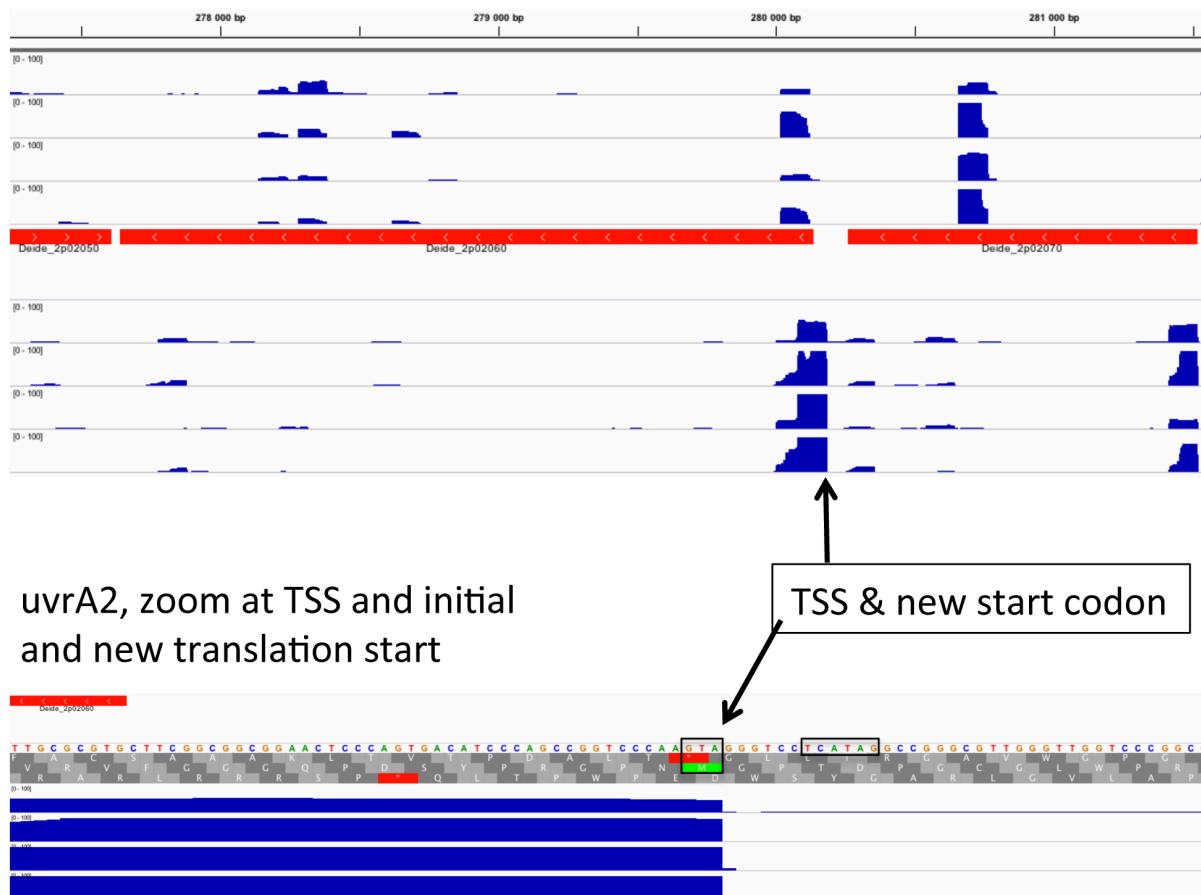

*uvrA2*, zoom at TSS and initial and new translation start

TSS & new start codon

### Deide\_12310 (recN) & flanking

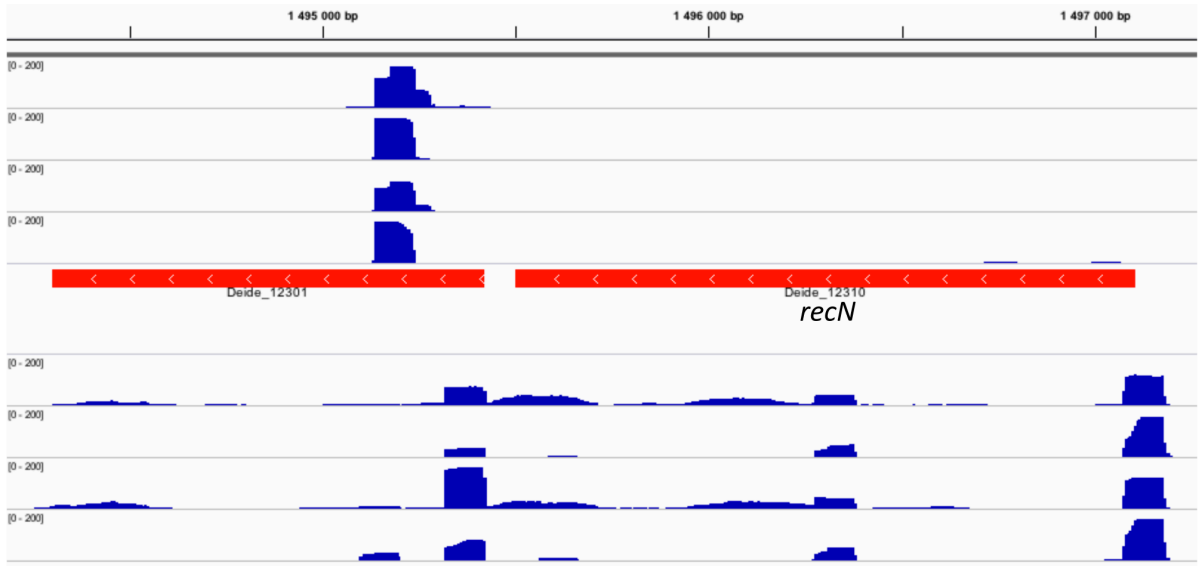

### recN, zoom at TSS and new translation start

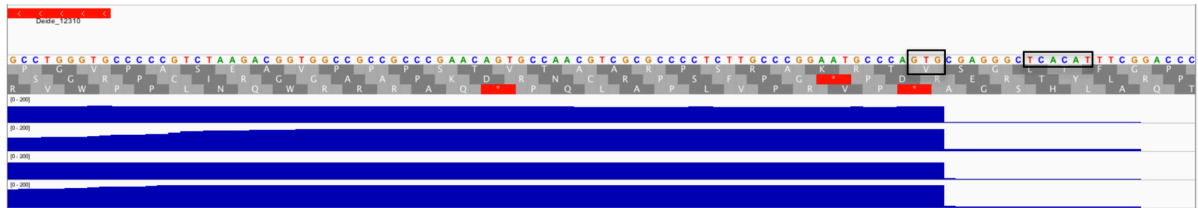

## Deide\_04980 (RarA) & flanking

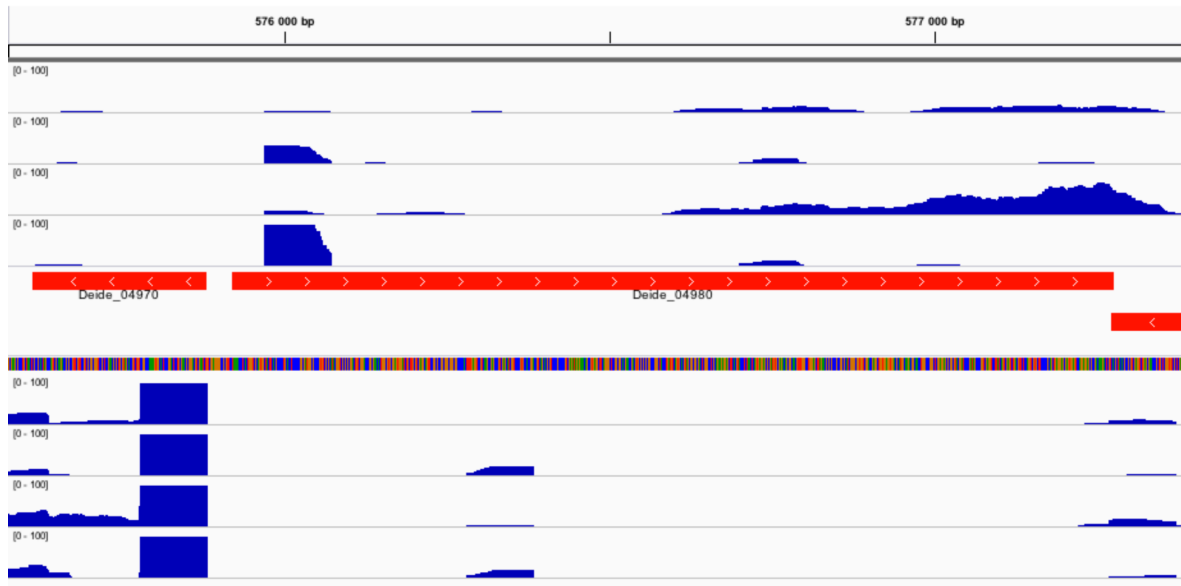

## RarA, zoom at TSS and new translation start

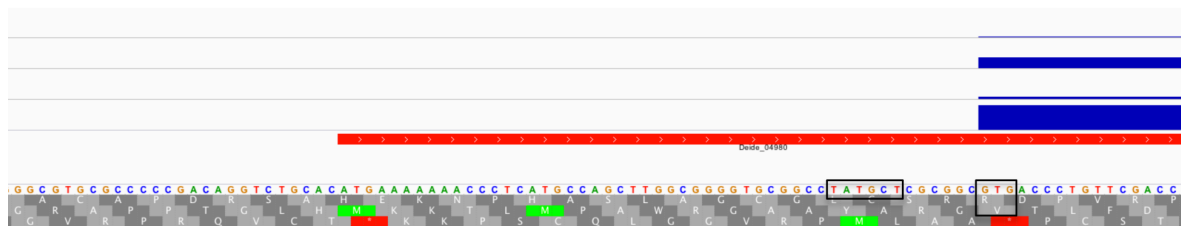

## Zoom at TSS of flanking gene

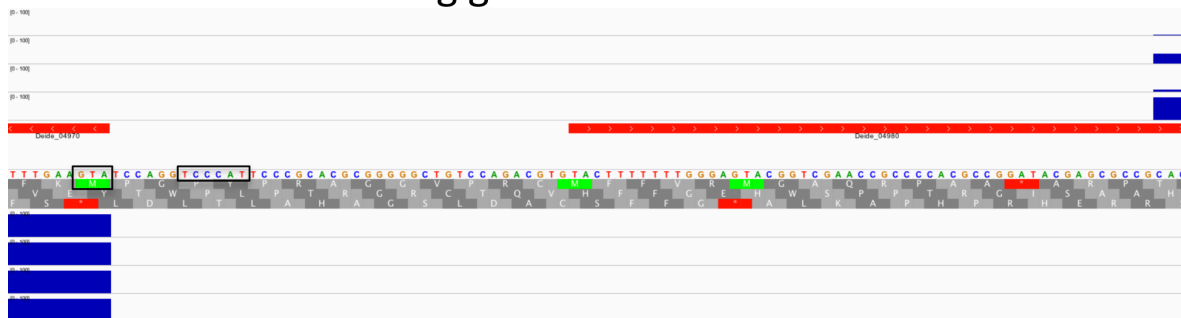

## Deide\_09360 (ruvA)

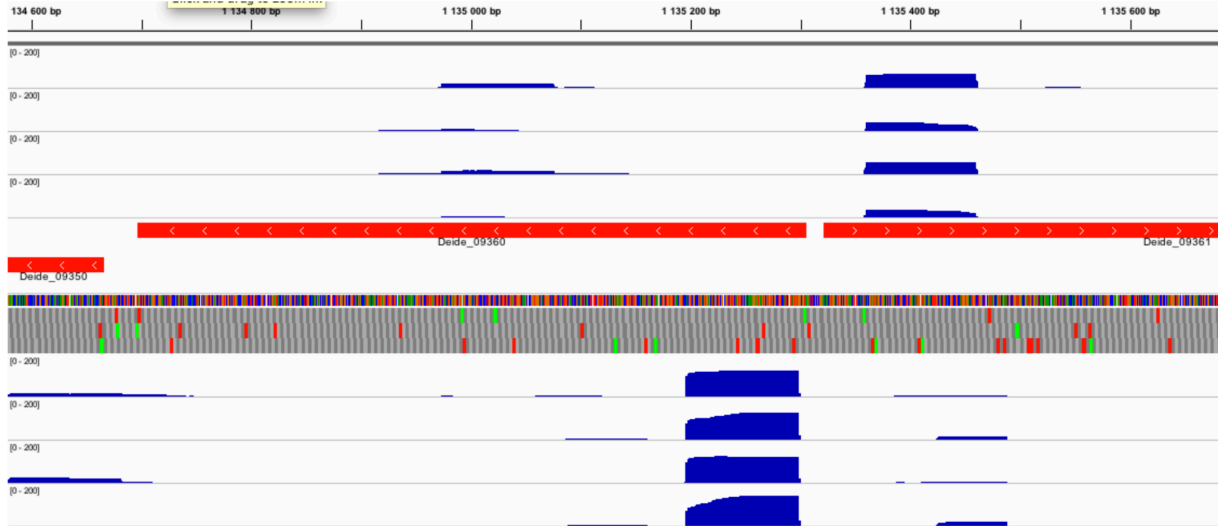

## ruvA, zoom at TSS and new translation start

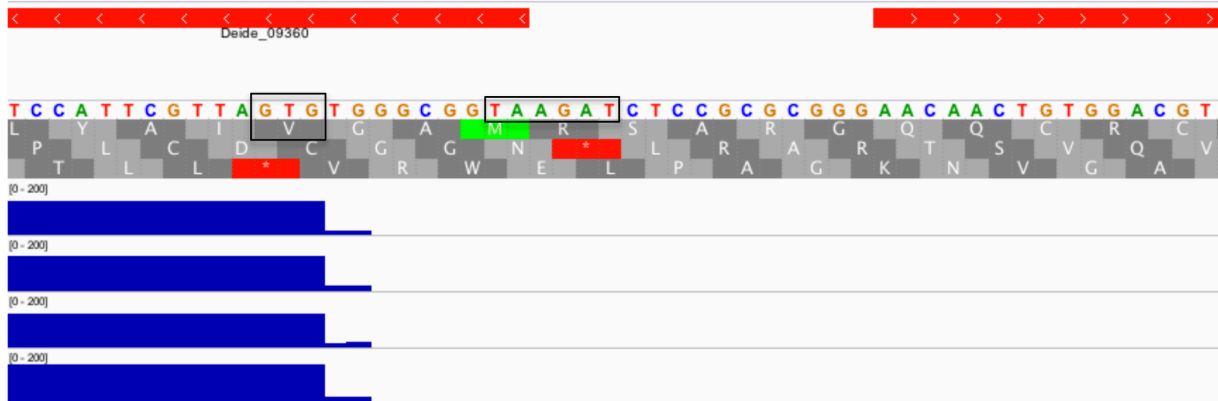



### Deide\_20630 (ruvC) & flanking

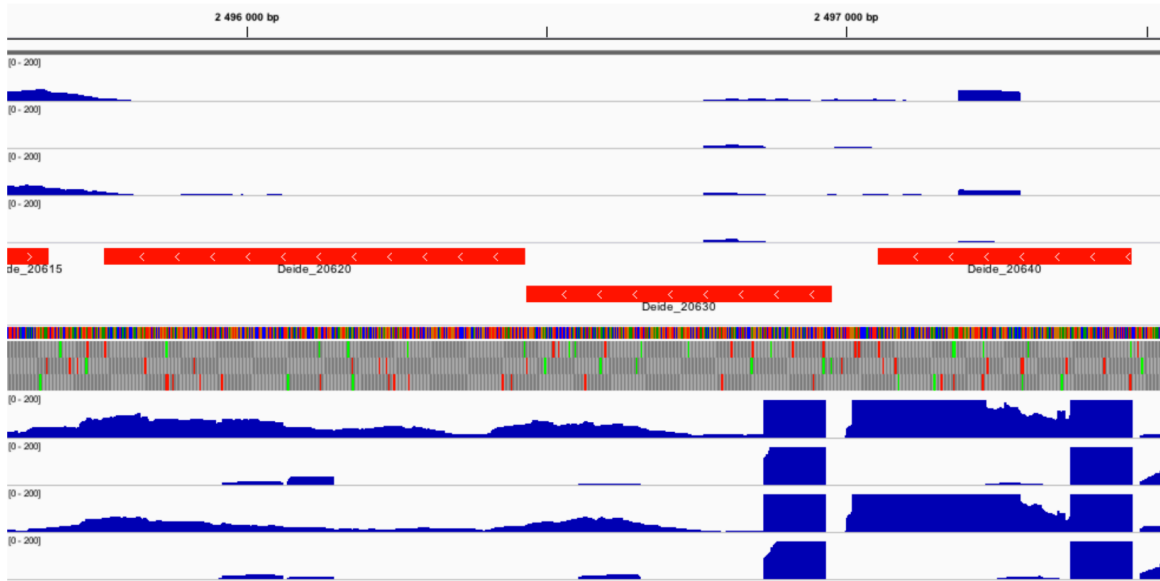

### ruvC, zoom at TSS and new translation start

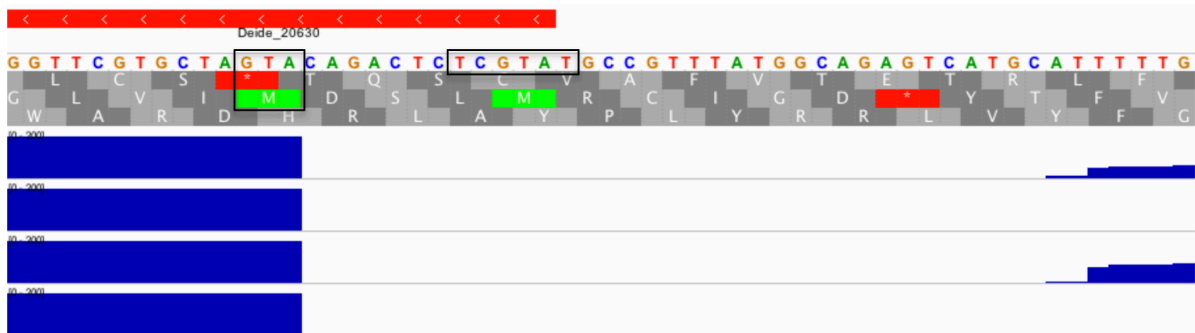

**Figure S5. Examples of predicted start codon corrections in *Deinococcal* homologs of *D. deserti* proteins.** In each example, the TSS was at the first nucleotide of the new start codon of the *D. deserti* protein. Blast and multiple alignments indicate that start codon re-annotation may also be required in several homologs, mainly from other *Deinococcus* species. Only the N-terminal regions of the proteins are shown. New annotated starts of proteins (*D. deserti*), or possible new starts (others), are in **green**. Initial wrong starts (*D. deserti*), or possible wrong starts (others), in **cyan**.

**Shorter *D. deserti* proteins:**

**Deide\_04020 (7aa) conserved protein of unknown function**

```
Deide_04020  ----MPPRMARITDLPSHWQPAPAGYKHVVSVSLGDSKRNAREEINVLGQPFFILERIGT
Dgeo_0492   MPQMRSGCSRLLHRMSLLRSWQPAPAGFKHVVSVSLGASKRNAREEISVLGQPFVLERIGT
Deipr_0163  -----MSDLLRSWK PAPPYKHVVSVSLGGSKRNAREEIEVLGQPFVLERIGT
Deima_2120  -----MTDLLKNWQPAPSGVRHVSVSLGSSKRNAREETEVLGQRFILERLGT
DR_1392     -----MLGQPFFILERLGT
                                         :*** *:****:
```

**tblastn on *D. radiodurans*: DR\_1392 should be longer**

```
Query 1      ITDLPSHWQPAPAGYKHVVSVSLGDSKRNAREEINVLGQPFFILERIGTDGDSRKAALFQ 60
            MTD S WQPAPAG+KHVVSVSLG+SKRNAREEINVLGQPFFILER+GTDGDS AA+LF+
Sbjct 1396664 ITDPLSGWQPAPAGFKHVVSVSLGNSKRNAREEINVLGQPFFILERLGTGDSALAARLFR 1396843
```

**Deide\_04980 (17aa) RarA, TSS at GTG; V in *D. geothermalis* is also GTG**

```
tr|C1D0F9|C1D0F9_DEIDV  ---MKKTLMPAWRGAAYARGITLFDPPAPLAERLRPRTVAEVVGQTHLLG
tr|E8U6J5|E8U6J5_DEIML  -----MTLFEPAPLAERLRPRTIEEVVGQRHLLG
tr|Q9RT67|Q9RT67_DEIRA  -----MTLFDPPAPLAERLRPRTVAEVAGQSHLLG
tr|Q1IYI8|Q1IYI8_DEIGD  MKKMLIRASLPLPAILPPIITLFDPPAPLPERLRPRTLAEVVGQHLLG
tr|FORJT4|FORJT4_DEIPM  -----MTLFDPPAPLAERLRPRTVAEVVGQTHLLG
                                         :***:*****.*****: **. ** ****
```

**Deide\_08770 (3aa) SsrA-binding protein [smpB], TSS at GTG (others also GTG at **V**); start of E8U8U7\_DEIML is also GTG.**

```
tr|C1D1M8|C1D1M8_DEIDV  MPRVYTNRRAHYEYELLERFEAGISLTGSEVKSIRAGGVDFRDAFARLHG
sp|Q9RUC1|SSRP_DEIRA     MRRVYTNRRAHHEYELLERFEAGISLTGSEVKSIRAGGVDFRDAFARING
tr|F0RLA9|F0RLA9_DEIPM  MPRVYVNRRAHGYEYELLDRYEAGLSLTGSEVKSIRAGGVDFRDAFARLNG
sp|Q1J063|SSRP_DEIGD     MRRVYTNRRAHHEYELLERFEAGIALTGSEVKSIRAGGVDFRDAFARLNN
tr|H8GVQ1|H8GVQ1_9DEIO  MRGVYTNRRAHYEYELLERYEAGISLTGSEVKSIRAGGVDFRDAFARLTN
tr|E8U8U7|E8U8U7_DEIML  ---MYTNRRAHYEYELLERFEAGIQLTGSEVKSIRAGGVDFRDAFARVTN
tr|D7CY66|D7CY66_TRURR  ---MIQNRRAASFYELLERFEAGLVLTGSEVKALRQGGVTLGEAYARVRG
                                         : **** .:*****:***: *****:.* *** : :*:**:
```

**Deide\_09360 (3aa) RuvA, TSS at GTG; **V** in E8U7P4\_DEIML is also GTG**

```
tr|C1D1T9|C1D1T9_DEIDV  MAGVIAYLSGVVREVRENSAVIVAGGVGYEVQCPAGTLGKLVVQNAELS
sp|Q1J0F6|RUVA_DEIGD     ---MIAYLSGAVREVREASAVIVAGGVGYEVFCPASTLGRVLPQPAELN
sp|Q9RUV7|RUVA_DEIRA     ---MIAYLSGVVREVRENSAVIVAGGVGYEVQCPAGMLARLKPGEAAEFS
tr|E8U7P4|E8U7P4_DEIML  MPMGVIAYLTGTVRDVRDTSAVIVAGGVGYEVLCPAPTLAKLRVNDTAEHLH
tr|FORMI0|FORMI0_DEIPM  ---MIVYLSGTVREVRTSSAVLQTTGGLGYEVFCPQSTLARLKPGEAAELH
                                         :*.***:*.***:***: ***:***** ** *.:* .. **:
```

**Deide\_09750 (17aa) *Deinococcus+Trueperia*-specific**

```
Deide_09750  -----MLRRQSRPQQGTRLPGLAHPEFVGLVNSLQATAEAAALGDLNAASA
DR_0889     MLPAASCTGGFFVTPSFLPVRTPASIAGLAHPEFVGLVNSLHATAEAAALGDLNAATA
Dgeo_1518   -----MCIEECSEYARGQTKSRVPRPTLPHMPNLEFVGLVNSLQATAEAAALGDLNAATS
Deipr_1288  -----MANPDFVGLVTSVQATAEAAALGDLNAATS
Deima_2235  -----MSSPEFMGLVQSLQASAEAAALGDLNAASA
Trad_1274   -----MADPRFIGLVHSLSSAEAAALGEEHSPMA
                                         *. ***:*** *: :*:*****: :. .:
```

**Deide\_09860 (16aa) Skp (OmpH)**

```

Deide_09860  M S C F I R L R K A H D T V T V M K M N A K V L A P L A V V A A F G L G T V S P S A Q T P A Q K I G F V D V A K L I S S
Dgeo_0715    M K G F I R L R K R R A S V P A M K M N A K A L A P L A L V A A F G L G T V A P H A Q T A P Q K I G F V D V Q K L L S A
DR_0989     M T C F I R L R N R H A S V A V M K I T A K A L A P V T L A A A F G L G T L A P H A Q T P A Q K V G F V N V D A L F A A
Deima_1344  -----M N V K Q M L P V A V V A A F A V G T L A P H A Q T A P Q K V G F V N V Q T V L E A
Deipr_1168  -----M N K A A K V L L P L S A V A A V A V A T V A P S A Q T P A Q K V G F V D V D R V F A A
              . * : * : . * . . . * : * * * * . * : * * * * * : : :

```

```

tr|C1CUK0|C1CUK0_DEIDV  M S C F I R L R K A H D T V T V M K M N A K V L A P L A V V A A F G L G T V S P S A Q T P A Q K I G
tr|Q1J0G7|Q1J0G7_DEIGD  M K G F I R L R K R R A S V P A M K M N A K A L A P L A L V A A F G L G T V A P H A Q T A P Q K I G
tr|Q9RVN8|Q9RVN8_DEIRA  M T C F I R L R N R H A S V A V M K I T A K A L A P V T L A A A F G L G T L A P H A Q T P A Q K V G
tr|E8U7F5|E8U7F5_DEIML  -----M N V K Q M L P V A V V A A F A V G T L A P H A Q T A P Q K V G
tr|F0RNJ4|F0RNJ4_DEIPM  -----M N K A A K V L L P L S A V A A V A V A T V A P S A Q T P A Q K V G
tr|Q5SK25|Q5SK25_THET8  -----M K R L P L I G V L L A L G A L L T P M L A Q N K T V A S R V G
tr|E8PM02|E8PM02_THES8  -----M K R F P L A A L L L A L G A L L T P M L A Q N K N V A T R L G
tr|F6DG85|F6DG85_THETG  -----M K R L P L I G A L L A L G A L L T P M L A Q N K T V A S R V G
tr|G8N8Y8|G8N8Y8_9DEIN  -----M K R F S L A A L L L A L G A L L T P M L A Q N K T L S T R V G
tr|B7A6H3|B7A6H3_THEAQ  -----M K R L P L A A L F L A L G A L L T P M L A Q N K N V A T R V G
              : . . : . . : . . : *

```

**Deide\_10430 (8aa) acetylglutamate kinase**

```

Deide_10430  -----M S Y A K V R T M I I V K V G G S A G I D Y D A V C A D L A A R W K A G E R L V L V H
Dgeo_0678    M P A L L F T C Y L L T M I V V K V G G S A G I D Y D A V C A D L A A L W Q G G Q R F V L V H
DR_1420     M L S R D Q H C F T F A K R F S F L V C I R I V N M I V V K V G G S D G I D Y D A V C A D L A E R W Q A G E K L I L V H
Deima_1346  -----M I V V K V G G S A G I D Y D A V C A D L A A R V Q A G E R F V L V H
Trad_1399   -----M I V V K V G G S T G I D Y D A L C E D V A A L W R E G Q R L V L V H
Mrub_2721   -----M I V V K V G G S E G I N Y E A V A K D A A S L W K S G Q K L I L V H
Ocepr_1796  -----M E D G L I V V K V G G S E G I D Y A A V A R D A A A L W K Q G R R L V L V H
Mesil_0435  -----M I V V K V G G S E G I N Y E A V A K D A A S L W K E G Q R L V L V H
              : * : * * * * * * * * * * : * : * * * * * * * * * *

```

**Deide\_11030 (8aa) Deinococcus-specific**

```

Deide_11030  --M W I A T L L G M V L W L V V V F I L L S A T L I L A L S F G P L K T A E N I R V I R M F A A V Q Y L A A L L L A L
Dgeo_1349   -----M V L W L V V A F I V L S A T L I L A L T L G P L R K A A N R V I Q L F A A V Q Y A A A V L L V G
Deima_2050  -----M A L W L L F A F I L M S A T L I L A L T L G P L K T A A N V R T I R A F A Y V Q Y A A A L L A G
DR_1429     M R A A T R Y P P P M L L W F V V I F I L L S A T G I L Y L T L G P L K T A A N V S T L R A F A A V Q Y L C A A I L A L
Deipr_0258  -----M L L W V L V G F I V L S A S V V L S L T F G A L R T S P Q V G L F R L I A G V Q F L A A A V L A G
              * * * . . * * : * * * * : * * * * * . . : : : * * * * * . * * * .

```

**Deide\_14250 (3aa) RecF, TSS at GTG**

Start codon in RecF from DEIGI, DEIPD, TRURR, MARHT, MEIRD and MEISD is GTG, and **V** in RecF from DEIGD, DEIRA, DEIPM, DEIML is GTG; RecF start in OCEP & THET is ATG.

```

RECF_DEIDV  -----M R G V Q L E S L S T L N Y R N L A P C T L S F P A G V T G V F G E N G A G K T N L L E A A Y L A L T G
RECF_DEIGD  -----M S G V Q L S S L S T L N Y R N L A P G T L H F P A G V T G V F G E N G A G K T N L L E A A Y L A L T G
RECF_DEIGI  -----M L L S G L S T L N Y R N L A P D T L E F P A G V T G V F G E N G A G K T N L L E A A Y L A L T G
RECF_DEIRA  -----M G D V R L S A L S T L N Y R N L A P G T L N F P E G V T G I Y G E N G A G K T N L L E A A Y L A L T G
RECF_DEIPM  -----M A P V R L S K L S T L N Y R N L A P D T L E F P A G V T G V W G E N G A G K T N L L E A A Y L A L T G
RECF_DEIML  M P L P R H A Y N A H M H L R A L T T L H Y R N L S P A T L D L P R G I T S I W G E N G A G K T N L L E A A Y L A L T G
RECF_DEIPD  -----M R L R A L T T L N F R N L T P D T L E L P A G L V S V S G A N G A G K T N L L E A A Y L V L T G
RECF_TRURR  -----M R L L S L Q Q L N Y R N L N T P R V T F G G G V T A I V G R N A A G K S N L L E A V Y L G L T G
RECF_OCEP5  -----M I L T R L R Q Q N F R N L T S L E L V L P P G P L A L V G P N A S G K T N L L E A I F L A L G G
RECF_MARHT  -----M R L L R F R Q R H F R N L R S S E L T L A G G P L A V V G A N A Q G K T N L L E A Y L A L G G
RECF_MEIRD  -----M R L L R L R Q K N F R N L F T P V F A P G P L T T V V G G N A Q G K T N L L E A I E L A L G G
RECF_MEISD  -----M R L L R L R Q T H F R N L K S P E F A P A P G L T T V V G G N A Q G K S N L L E A I Y L A L G G
RECF_THET2  -----M R L L L F R Q R N F R N L A L E A Y R P P P G L S A L V G A N A Q G K T S L L L G I H L A L G G
              : * : : * * * * * * * * * * * * * * * * * * * *

```

**Deide\_16430 (12aa) (uncharacterized Deinococcus-specific)**

```

Deide_16430  -----M C P A A S P A Y A A A M N V T R H F S D T R A N T G R V R F L L Q S G R V R L V A E G E S W Q H H
Dgeo_1997    M P T Q D L I I L T D A P L T S P A Y A E R M N V T R H F S D T R T G E G R V R F L I T G G R V R L V A E G P G W Q L E
DR_0600     -----M N V I R H F S D T R T G E G R V R F L I T Q G R V R L V A E G P G W S H E
DGo_CA0379  -----M S A R Y A R G M N V T R H F S D T R T D E G R V R F L V L S G R V V L V A E G Q G W Q S S
Deipr_0112  -----M A Q L I P R Y A V M N T A R H F S D T R T E G R V R F L L S D R C V Q L V A E G P G W Q H C
Deima_1143  -----M F R H L S D T R T D E G R V R V L I D G A S V L L R A E T H A W Q H D
              * * : * * * * : * * * * * * * * * * * *

```



(Figure S5, continued)

**Deide\_2p02180 (231aa) putative transcriptional regulator**

```
Deide_2p02180 MDTLPARLRGRLEHGLHG---V VAPVEVGAGQPALRKWARAASWTVLDALPGP-GARRWLWCP
DGo_PB0322 -----MAPVEVGAGQPELLAWAQARGWRPTRAAPVH-GTRGWVWWP
Deima_0584 MVLLPARVRLAVRPTVVVAPVGVGFAQDALLQWATAHGTYVTRDLTGD-ETGLTVVWWP
Mrub_0345 MSVLSPSALELLATAPAVVVAPVIGFAQTDL EAWAHKTRRRILRDPAEFSGLAPTLILP
          :*** :* .* * ** . : *

Deide_2p02180 ATHTDLRSLSG---EHYAALILSMSDLSPDEDDWNAALSGASPDWRQQTFAAFGRWPAAM
DGo_PB0322 RYRSEVQAWAAGAGHAAKVLILSGDELLDAGEWAAALG--DSDWGRVTFQSSGWPAAL
Deima_0584 RSRGALETLGN-HADPRAALLLEEADLTYHLEDWANALPGLSADKAADSHAQAEGWPAAL
Mrub_0345 QRRSDLERLNS--SDPRDFLFLRESDLLFSHDEWQQAVS-----TQQTYAETGGWPEAL
          : :. . ** :* :* * : :.* ** *;

Deide_2p02180 ELLARLLAQQGTENLPVVEELHRHPLMSVLVAPYQPSGSLRAAAVQLAAAALVTPAVADG
DGo_PB0322 DPVRGLAGRAAGD-----WAAHPQLQAALAPLLP-DVEQDNYAQLARTPLVTPPVQAL
Deima_0584 PLAAALADHPATD-----LAAHPLAPALLGPLLPPMLRSFAFERLAPAPLVTPDVARL
Mrub_0345 ALLQRIVLQPGES-----LVRHPLCVARLGSLLPKDIPREILAKAAQSPLLIPELYGL
          : : . . ** . :.. * : : * :.* : *

Deide_2p02180 LDVERHHELTLSDEGWLWPSGGWAFPELLRRTLAPVPDPRRAIRAAQALQAAGHMPEAL
DGo_PB0322 LGVDGAALATLADGGWLWPAPGGWRVPALLRRLVLPALDVTL SAQVAALSSAGHVGEAL
Deima_0584 LGTSADDVRALVDGGWLTPIPGWRAPTLLRHLAAPAATARTAEIRIARALHDAGHTDAAL
Mrub_0345 LGLDDTSVAELYDRGLLYAQSSGLAMPKLLRLYLRSIPAEVARFIEITLLASGHVTAVAL
          *. . : * * * * . .* * *** : : * :** .*
```

**tblastn on D. gobiensis:**

```
Query 1 MDTLPARLRGRLEHGLHG---V VAPVEVGAGQPALRKWARAASWTVLDALPGP GARRWL 56
M + RLR RL +G +VAPVEVGAGQP L WA+A W A P G R W+
Sbjct 259075 SEVSQRLRQRLEGSNGP WAGIVAPVEVGAGQPELLAWAQARGWRPTRAAPVHGTRGWV 258896
```

**Figure S6. Detected homologs for peptides and proteins from 17 new leaderless transcripts.** New gene labels are mentioned. The TSS for these 17 *D. deserti* genes is at the first nucleotide of the start codon. Results of BLASTP, and TBLASTN (if any), and alignments are shown. Non-annotated homologs in *D. radiodurans*, *D. geothermalis* and/or *D. gobiensis* were found for Deide\_07364, Deide\_14766, Deide\_15148 and Deide\_23068. Amino acid composition and domains found by SMART are shown for several proteins (horizontal red and pink bars represent signal peptide and low complexity region, respectively; vertical blue bar represents transmembrane helix).

**Deide\_00694** conserved protein of unknown function (63aa)  
 MTDKGN~~EA~~EQMQEAY~~AE~~RQEQEQATGKTSAGGAGSTGTPGNQHTGTETTEENDNGPRSGPTEN

Blastp: only one homolog (Deipe\_2139)  
 Tblastn: no more hits

```
Deide_00694      MTDKGNEAEQMQEAYAERQEQEQATGKTSAGGAGSTGTPGNQHTGTETTEENDNGPRSGP
Deipe_2139      MTDKHNEAEEMRDAYAQRQHEAEGAPTSAGGAGSTSTPGNTEAGTEDTGKNQAGSDQSP
                ****  ***: *::***:***:* . *****.*** .:*** * ::* . . .*
```

```
Deide_00694      TEN-----
Deipe_2139      IDPTADAGR
                :
```

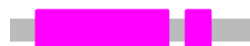

**Number of amino acids:** 63  
**Molecular weight:** 6570.7  
**Theoretical pI:** 4.26  
**Amino acid composition:**

|                |           |              |                |           |              |
|----------------|-----------|--------------|----------------|-----------|--------------|
| Ala (A)        | 6         | 9.5%         | Arg (R)        | 2         | 3.2%         |
| Asn (N)        | 5         | 7.9%         | Asp (D)        | 2         | 3.2%         |
| Cys (C)        | 0         | 0.0%         | Gln (Q)        | 6         | 9.5%         |
| <b>Glu (E)</b> | <b>10</b> | <b>15.9%</b> | <b>Gly (G)</b> | <b>10</b> | <b>15.9%</b> |
| His (H)        | 1         | 1.6%         | Ile (I)        | 0         | 0.0%         |
| Leu (L)        | 0         | 0.0%         | Lys (K)        | 2         | 3.2%         |
| Met (M)        | 2         | 3.2%         | Phe (F)        | 0         | 0.0%         |
| Pro (P)        | 3         | 4.8%         | Ser (S)        | 3         | 4.8%         |
| <b>Thr (T)</b> | <b>10</b> | <b>15.9%</b> | Trp (W)        | 0         | 0.0%         |
| Tyr (Y)        | 1         | 1.6%         | Val (V)        | 0         | 0.0%         |

**Deide\_02488** conserved protein of unknown function (85aa)  
 MLILDGKYQVQ~~Q~~NKRLTILAEAGHLPKGTLQSDIDALHDDCQAHGRCDVQVNTQHGLMQGTLVEKKPLKFSLWQFEGHLSFPART

Blastp: homolog only of other new leaderless gene Deide\_11736 and DGo\_CA2102 (86aa)  
 Tblastn: not more hits

```
Deide_02488      MLILDGKYQVQQNKRLTILAEAGHLPKGTLQSDIDALHDDCQAHGRCDVQVNTQHGLMQ
Deide_11736      MIILQGTYQVAPTKRLTILAESGHQGKGTLATDIDALSKGCAQGGKCDITVTTQHGPMT
DGo_CA2102       MLTLEGQYHVAPNKRLTISADTTGLPKGGSLTDLEALSRACLLNNGRCEVQVTTQNGVMQ
                * : * : * * : * .***** *:: ** :*::** * . :*::* .***:*
```

```
Deide_02488      GTLVEKKPLKFSLWQFEGHLSFPART
Deide_11736      GTLYEKKPRKLSLWQFEGHLSFPQRS
DGo_CA2102       GTLTERPSRQFHRRLFEGYLAFPSRS
                *** * : . ::* ***:*** *:
```

**Deide\_11736** conserved protein of unknown function (86aa)  
MIILQGTYYQVAPTKRLTILAESGHQKGTLATDIDALSKGCAQGGGKCDITVTTQHGPMTGTLYEKKPRKLSLWQ  
FEGHLSFPQRS

Blastp: homolog only of other new leaderless gene Deide\_02488 and  
DGo\_CA2102 (86aa)  
Tblastn: not more hits

```
Deide_02488      MLILDGKYQVQNKRLTILAEAGHLPKGTLSQSDIDALHDDCOAHG-RCDVQVNTQHGLMQ
Deide_11736      MIILQGTYYQVAPTKRLTILAESGHQKGTLATDIDALSKGCAQGGGKCDITVTTQHGPMT
DGo_CA2102       MLTLEGQYHVAPNKRLTISADTTGLPKGSLTDLEALSRACLLNNGRCEVQVTTQNGVMQ
                *: *: * *: * .***** *: : ** :*:*: * . :*: : *.**:* *
Deide_02488      GTLVEKKPLKFSLWQFEGHLSFPART
Deide_11736      GTLYEKKPRKLSLWQFEGHLSFPQRS
DGo_CA2102       GTLTERPSRQFHRRLFEGYLAFPSRS
                *** *: . : : ***:*** ** :
```

---

**Deide\_04802** conserved protein of unknown function (36aa)  
MEFLLAGLTIVGSLILASIQHRPQQGRVSVRTRSRKG

Blastp: only DGo\_CA2417  
Tblastn: nothing

```
Deide_04802      MEFLLAGLTIVGSLILASIQHRP-QQGRVSVRTRSRKG
DGo_CA2417       MELLLAALATLTALLLASRQAAPRKYARVPVRHHSRR
                **:***.*: : :*:*** * * : .**.** :
```

---

**Deide\_11672** protein of unknown function, partial (25aa) (pseudogene  
together with Deide\_11671 and Deide\_11670; DegV family protein)  
MIAVLTDSTSDFSPEAARRGHTTSK

Blastp: N-terminal fragment of DegV family protein

```
Deide_11672      -MIAVLTDSTSDFSPEAARRGHTTSK-----
Deipr_0962       -MIAVLTDSTCDLPPAALRDLGAGMLPLEVRLNGQTLRDWEEVTPQQVFGQLER...
LJ_1180          MKIALITDSTSDISPEEAKANDITVVPIPVIIIGDKQYMDGVDITAEKLFELERD...
PF01_00648       MKIALITDSTSDISPEEAKANDITVVPIPVIIIGDKQYMDGVDITAEKLFELERD...
Deide_12040      MTIAIVTDSTSDLSPELLDHYGIVSVPLYVLFDGKMHKDGIDLTPPELFAGLRA...
Deima_2005       -MIAVVDSTCDLSPAQLQEQQGVTVVPLHVQVGDQQLDWVELDPDDLRRMEQ...
                ***:***.*:.*
```

---

**Deide\_1p00954** conserved protein of unknown function (74aa)  
MASSSLSAVATHVLEFLQOEHQKPRSADELAALLQRDRAEVNRALEELQAAGLVAPEAVSGYGGNDTVWSVTHS

The protein (74aa) has some homology with HTH\_11 domain (a Pfam domain.  
Position: 9 to 63, E-value: 4.9e-05)  
Blastp: one good homolog of similar length  
Tblastn: not more good hits

```
Deide_1p00954    MASSSLSAVATHVLEFLQOEHQKPRSADELAALLQRDRAEVNRALEELQAAGLVAPEAVS
Deipr_2258       ----MTSSAATQVLEFLTREGPKAHSADLAALLNLDGETVQAALQELHAQGSAAPEEVS
                *:.**:*:*:* * * .*****: * * : **:*:* * * ** **
Deide_1p00954    GYGGNDTVWSVTHS-
Deipr_2258       GYGGSETVWRASQVN
                ***.:*** .: :
```

(Figure S6, continued)

**Deide\_04426** conserved exported protein of unknown function (58aa)  
 MKRTIPLLLIAALLLASCDDGAETETDTSTSTTTTTSTDQEDTTDQTSTSTTTTEEEK

Blastp: several hits (lipoprotein signal peptide followed by T-rich region is found in various proteins), but only DR\_1317 and DGo\_CA2846 of similar size.

Tblastn: not clearly more hits

```
Deide_04426 -----MKR---TIPLLLIAALLLASCDDGAETETDTSTSTTTTTSTDQ
DR_1317      MRCRSRSHARSLAAFDNGAMKKAVLAVPALLLALSLSGCQKQADSNTSTSTTTTKSTDSTG
DGo_CA2846  -----MLDTEAMKR---LLPLAAALLLAGCSNQGSG-TSSSTTTTKTFDSSG
                **:      :* *  ** *:.*. . .  *.:**:*:. : :
```

```
Deide_04426  EDTTDTTQSTSTTTTEEEK
DR_1317      QNTGTTTSTTTTDTNNK-
DGo_CA2846  QPAGTSTTTTESNK----
                : :  :* :*: : .
```

Probable correct start of DR\_1317 and DGo\_CA2846 are in **green**.

The D at +2 after the cysteine indicates attachment of the mature protein to the inner membrane.

LPAM\_1[pfam08139], Prokaryotic membrane lipoprotein lipid attachment site; In prokaryotes, membrane lipoproteins are synthesized with a precursor signal peptide, which is cleaved by a specific lipoprotein signal peptidase (signal peptidase II). The peptidase recognizes a conserved sequence and cuts upstream of a cysteine residue to which a glyceride-fatty acid lipid is attached.

```

                                10
                                .....*.....|.....*..
lcl|local_MKRTIPLLLIA 1 MKRTIPLLLIAALLLASC 17
Cdd:pfam08139         1 MKKLLLLLLALLLLAGC 17
```

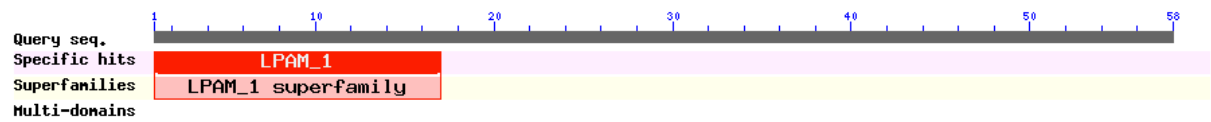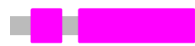

ProtParam of the mature protein starting with C:

Number of amino acids: 42  
 Molecular weight: 4455.3  
 Theoretical pI: 3.40  
 Amino acid composition:

|                |           |              |                |          |              |
|----------------|-----------|--------------|----------------|----------|--------------|
| Ala (A)        | 1         | 2.4%         | Arg (R)        | 0        | 0.0%         |
| Asn (N)        | 0         | 0.0%         | <b>Asp (D)</b> | <b>6</b> | <b>14.3%</b> |
| Cys (C)        | 1         | 2.4%         | Gln (Q)        | 2        | 4.8%         |
| <b>Glu (E)</b> | <b>6</b>  | <b>14.3%</b> | Gly (G)        | 1        | 2.4%         |
| His (H)        | 0         | 0.0%         | Ile (I)        | 0        | 0.0%         |
| Leu (L)        | 0         | 0.0%         | Lys (K)        | 1        | 2.4%         |
| Met (M)        | 0         | 0.0%         | Phe (F)        | 0        | 0.0%         |
| Pro (P)        | 0         | 0.0%         | <b>Ser (S)</b> | <b>5</b> | <b>11.9%</b> |
| <b>Thr (T)</b> | <b>19</b> | <b>45.2%</b> | Trp (W)        | 0        | 0.0%         |
| Tyr (Y)        | 0         | 0.0%         | Val (V)        | 0        | 0.0%         |



**Deide\_14223** conserved protein of unknown function (56aa)  
MRIDDHMDLNELAQHMGGATIEQARRMRELLLEKPRARTEDFTGKEWAEVLVLEATR

Blastp: only one good hit of similar size (DR\_0413)  
Tblastn: not more hits

```
Deide_14223 -----MRIDDHMDLNELAQHMGGATIEQARRMRELLLEKPRARTEDFT
DR_0413      MKKREWEKPERACHTAGMKIDERMDLQELATQMGSEDTAEAAARLRDLLLLGTGRETEDFS
                *:::***:*** :*.   : * *::*** . * *****:

Deide_14223      GKEWAEVLVLEATR---
DR_0413          GEEWAEELLIRAGEQNK
                *:*****:.* .
```

Possible correct start of DR\_0413 in **green**

---

**Deide\_07364** conserved protein of unknown function (36aa)  
MREFLNDWWRLGKLTAAATLAIPVVLWGLLVLLGILR

Blastp: three *Deinococcus* homologs (V in Deima\_1393 = GTG)  
Tblastn: indicates homologs also in other *Deinococcus*, see below

```
Deide_07364 -----MREFLNDWWRLGKLTAAATLAIPVVLWGLLVLLGILR
Deipr_1862 -----MPEWLNDDWWRLKLTVLSLAVPVLWALLVWAGVLH
Deima_1393      MKVPWRTFAAGRPCYAEVKEFFNDWWRLKLVLSLAVPVLVYLLLVWVWVILK
Deipe_3104 -----MREFWDYWWRFKFTVGALAVPVLVYLLLVWVWVILK
                : * : *:: * : . : *:: *:: *:: *:: *::
```

**tblastn:**

*Deinococcus gobiensis* I-0, complete genome

Features:

87 bp at 5' side: Phosphoglucomutase, alpha-D-glucose phosphate-specific  
194 bp at 3' side: putative Fructose-bisphosphatase

```
Query 1          MREFLNDWWRLGKLTAAATLAIPVVLWGLLVLLGILR 36
                MREFLNDWWRL KLT ATLAIPV LW LLV G+LR
Sbjct 2750143    MREFLNDWWRLIKLTVATLAIPVALWLLLVWAGVLR 2750250
```

*Deinococcus geothermalis* DSM 11300, complete genome

Features:

115 bp at 5' side: phosphoglucomutase, alpha-D-glucose phosphate-specific  
187 bp at 3' side: fructose-1,6-bisphosphatase, class II

```
Query 1          MREFLNDWWRLGKLTAA 17
                MREFLNDWWRLGKLTAA
Sbjct 1973393    MREFLNDWWRLGKLIAG 1973443
```

*Deinococcus radiodurans* R1 chromosome 1, complete sequence

Features:

hypothetical protein (= DR\_2037 on opposite strand)

```
Query 1          MREFLNDWWRLGKLTAAATLAIPVVLWGLLVLLGILR 36
                MRE L D WR+ KL A P+++WG LV +G+L+
Sbjct 2053590    MRELLTDLWRIFKLVAGICIGPLLIW GALVVMGVLK 2053483
```

**Further analysis reveals the following entire non-annotated proteins:**

Dgob MREFLNDWWRLIKLTVATLAIPVALWLLLVWAGVLR  
Dgeo MREFLNDWWRLGKLIAGVLAALPLLWGLLVWAGILH  
Drad MRELLTDLWRIFKLVAGICIGPLLIW GALVVMGVLK

```
Deide_07364 -----MREFLNDWWRLGKLTAAATLAIPVVLWGLLVLLGILR
Deipr_1862 -----MPEWLNDDWWRLKLTVLSLAVPVLWALLVWAGVLH
Deima_1393      MKVPWRTFAAGRPCYAEVKEFFNDWWRLKLVLSLAVPVLVYLLLVWVWVILK
Deipe_3104 -----MREFWDYWWRFKFTVGALAVPVLVYLLLVWVWVILK
Dgob            -----MREFLNDWWRLIKLTVATLAIPVALWLLLVWAGVLR
Dgeo            -----MREFLNDWWRLGKLIAGVLAALPLLWGLLVWAGILH
Drad            -----MRELLTDLWRIFKLVAGICIGPLLIW GALVVMGVLK
                : * ** : * . * : : * : *::
```

---

(Figure S6, continued)

Deide\_12656 conserved exported protein of unknown function (70aa)
Protein detected by proteomics (Figure S4).
MTKLLKLLAFSAVLALPVNAGAQTNTTETTTNIEMNERGTDWGLGLAGLLGLAGLAGRRHVETSTVRR

Blastp: many hits (note conserved C-terminal region, which is present in many more homologs of similar size)

Deide\_12656 -MTKLLKLLAFSAVLALPVNAGAQTNTTETTTNIEMN-----ERGTDW
Dgeo\_1211 -MTRVLKALTLTALLALPVSALAQTDTTTTATTTTNN-----GFDW
DR\_1067 --MKLLKTVAVVAALALPVAASAQDTNNTTGTQTQTQTTE-----KRGFDW
Deipr\_2033 -MKKATYTLTLLTGLLAAPITASAQTETTSTTSTTSTPETTTT----TVERENDGFDW
Deima\_0510 MTQRMKHTLLALTLTFAATPFAAQDTTTTGTDTGTTQTNTNN-----DNDNDGFDW
Deipe\_0721 MTKMKTLLTALLLAPLALPAQAQDTTGTGTGTTDTTDTANTGTNTATQNE DRGMDW
: \* \*\* . : \* . \* \*\*

Deide\_12656 GWLGLAGLLGLAGLAG-----RRHVETSTVRR-----
Dgeo\_1211 GWLGLAGLIGLAGLAG---GSRRYVDTAPGRR-----
DR\_1067 GWLGLLGLAGLLGLGRQPAPVHTTTTTRR-----
Deipr\_2033 GWLGLLGLAGLAGRRR---EPEHVVRTAPVHTTPTQTHTTTHTNDTTRR
Deima\_0510 GWLGLLGLLGLAGLRRQEPPEVHLGGPTDGP RR-----
Deipe\_0721 GWLGLLGLAGLAGLRKPTPTVVVPDN---TGARR-----
\*\*\*\*\* \*\* \*\* \*

with some more homologs:

Deide\_12656 -----MTKLLKLLAFSAVLALPVN---AGAQTNTTETTTN-----IE
Dgeo\_1211 -----MTRVLKALTLTALLALPVS---ALAQTDTTTTATTT-----TT
DR\_1067 -----MKLLKTVAVVAALALPVA---ASAQDTNNTTGTQTQT-----TTTT
Deipr\_2033 -----MKKATYTLTLLTGLLAAPIT---ASAQTETTSETTTSTTSTPETTT-----TTVE
Nos7107\_2275 -MKSNTKALGAGVLTGLMAIMPLTTLPVQAQDN-----TTTTGDAPRTTT-----YD--
N9414\_23183 -MTRNFTKAVGAGFLTSMAMPLPT-LPVNAQVT-----DPRVETTPRTTV-----YE--
Glo7428\_3587 MKRSQLSKIFGASVGLSLAVLPST-LPVSAQTNTAPGTTDTTTTAPT-----TTTT
Ava\_2326 -MNRDFSKTVGAAVITLSMATLPLS-LPANAQVQ-----TAPRTDGTTRT-----YDRT
FJSC11DRAFT\_0576 MMKNNLTKMVGASVLTGLMTILPLT-IPAQAQTT-----TDPINNNPPN-----TG-V
Deima\_0510 -----MTQRMKHTLLALTLTFAATP---AFAQDTTTTGTDTGTTQTNTNN-----D
Deipe\_0721 -----MTKMKTLLTALLLAPLALP---ALAQTDGTGTTGTTGTTDTTDTANTGTNTATQ
. \*\*

Deide\_12656 MNERGTDWGLGLAGLLGLAGLAG-----RRHVETSTVRR-----
Dgeo\_1211 TN--GFDWGLGLAGLIGLAGLAGGS-----RRYVDTAPGRR-----
DR\_1067 TEKRGFDWGLGLLGLAGLLGLGRQQ-----PAPVHTTTTTRR-----
Deipr\_2033 RENDGFDWGLGLLGLAGLAGRRREPEHVVRTAPVHTTPTQTHTTTHTNDTTRR---
Nos7107\_2275 --RNDFDWGLGLLGLAGLAGRGRK-----HNDETTRYRDPNAPG---ATSYRD-
N9414\_23183 --RRDFDWGLGLIGLGLAGLAGRGRK-----RGEPTAYREPTTPG---STTYRD-
Glo7428\_3587 ETNDGFDWGLGLLGLAGLAGLAGRGRK-----SEPTRYREPDTVGTTSSTYREP
Ava\_2326 ADRNDFDWGLGLLGLAGLAGRGRK-----RDDEPTRYRDPNAPG---ASSYRE-
FJSC11DRAFT\_0576 YYDRGFDWGLGLLGLAGLAGRGRK-----RNDEPTRYRDPNAPG---SSTYRE-
Deima\_0510 NDNDGFDWGLGLLGLAGLAGRGRK-----PPREVHLGGPTDGP RR-----
Deipe\_0721 NEDRGMDWGLGLLGLAGLAGLRKPT-----PTVVVPDN---TGARR-----
. \*\*\*\*\* \*\* \*\* \*

SP='YES' Cleavage site between pos. 22 and 23: AGA-QE D=0.848 D-
cutoff=0.510 Networks=SignalP-TM.

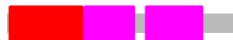

ProtParam of mature protein starting with Q:

Number of amino acids: 48
Molecular weight: 5270.8
Theoretical pI: 5.65
Amino acid composition:

Table with 5 columns: Amino acid, Count, Percentage, Amino acid, Count, Percentage. Rows include Ala (A), Asn (N), Cys (C), Glu (E), His (H), Leu (L), Met (M), Pro (P), Thr (T), Tyr (Y), Arg (R), Asp (D), Gln (Q), Gly (G), Ile (I), Lys (K), Phe (F), Ser (S), Trp (W), Val (V).

(Figure S6, continued)

**Deide\_14766** conserved protein of unknown function (34aa)  
MKGLGEFIEWLREVLK GASQPQPVPVVRQR

Blastp: homology with Deipe\_0001 and Deima\_1530  
Tblastn: also homology with other *Deinococcus*, see below

```
Deide_14766 -----MKGLGEFIEWLREVLK GASQPQPVPVVRQR---
Deima_1530 -----MSAPYNEAMKALEDFLQKLRRELIRAGT----TPKPALVPVPVVRTRQPRR
Deipe_0001 MTLIRSERKLILVMDLKKALSALREALERLLG--AKPQPVPVPVVRRRR---
syc0626_d -----MGLVDQILDRLQDLARRLIEALFGPEAQPEPEPIPVPVRDRR---
                . * . * . : . * : * : * * * *
```

**tblastn:**

*Deinococcus radiodurans* R1 chromosome 1, complete sequence  
Features:  
111 bp at 5' side: GTP pyrophosphokinase  
45 bp at 3' side: peptidyl-prolyl cis-trans isomerase, FKBP-type

```
Query 1          MKGLGEFIEWLREVLK GASQPQPVPVVRQR 33
                +KGL EF+EWLR VL G +P+PQPVP+ VR R
Sbjct 1867050    VKGLSEFLEWLRGVLTGLGEPRQPVPVVRTR 1866952
```

*Deinococcus gobiensis* I-0, complete genome  
Features:  
147 bp at 5' side: Peptidylprolyl isomerase FKBP-type  
228 bp at 3' side: ppGpp synthetase I, Spot/RelA

```
Query 1          MKGLGEFIEWLREVLK GASQPQPVP 27
                MKGL EFI+WLRE L+GA QP+P P+P
Sbjct 1110864    MKGLREFIDWLRETQAGAPQPKPVP 1110944
```

*Deinococcus geothermalis* DSM 11300, complete genome  
Features:  
242 bp at 5' side: sigma 54 modulation protein/ribosomal protein S30EA  
354 bp at 3' side: ABC transporter related protein

```
Query 1          MKGLGEFIEWLREVLK GASQPQPVP 26
                MKGL E I+WLRE LKG++ PQP PV
Sbjct 1466393    MKGLRELIDWLREALKGSASPQPVPV 1466316
```

**Further analysis reveals the entire non-annotated proteins, included in the multiple alignment:**

```
Deima_1530 -----MSAPYNEAMKALEDFLQKLRRELIRA-GTTPKPALVPVPVVRTRQPRR
Drad -----MKGLSEFLEWLRGVLTG-LGEPRQPVPVVRTRRER-
Deide_14766 -----MKGLGEFIEWLREVLK GASQPQPQ--PVPVVRQR-
Dgob -----MKGLREFIDWLRETQAGAPQPKP--VPIPVRVRDRR-
Deipe_0001 MTLIRSERKLILVMDLKKALSALREALERLLG--AKPQPVPVPVVRRRR---
syc0626_d -----MGLVDQILDRLQDLARRLIEALFGPEAQPEPEPIPVPVRDRR---
Dgeo -----MKGLRELIDWLREALKGSASPQPVPVVRVRDRR---
                : . . : . * . * * * *
```

---

**Deide\_15148** conserved protein of unknown function (91aa)

MSGFSGGGFSFSRSSHGRGGFFAHSRSSHGRGGMVGGLLGHSSSHSGRRGHYVQGGHYRQAKRRRSSGGCLGAFVLT  
AGLAGAGVMGLVSLIA

Blastp: only two good homologs  
Tblastn: also homology in *D. geothermalis*

```

Deide_15148      MSGFSGGGFS--FSRSSHGRGGFFA--HSRSSHGRGGMVGGLLGHSSSHSGRRGHYVQGGH
DGo_CA2041      MSSHSGRGFFGHSRSSHGRGGFVSRGHSSSHSGHRRGMMGGLMGGSSSGHRGHYAQGGH
Deima_0925      MSGFSGGGFS---FSRSSGRGARGFRGHSSSHSHSGG-----HRYGHRGH
                **..** .*          .  **.      **:* .* *                *: : **

```

```

Deide_15148      YRQAKRRRSSGGCLGAFVLTAGLAGAGVMGLVSLIA---
DGo_CA2041      FRPQQR--GLGCLGVFVGAALLGGGVAGLVSLVA---
Deima_0925      ARHVVR--GGCLGAFVVGAVLSGAVAAVGGVFALLA
                *   **   ****.*:* ..: ...* ..: ..:*

```

**tblastn:**

Deinococcus geothermalis DSM 11300, complete genome

Features:

aminoglycoside phosphotransferase

```

Query 18          RGGFFAHSRSSHGRGGMVGGLLGHSSSHSGRRGHYVQGGHYRQAKRRRSSGGCLGAFVLTAG 77
                  R G+  HS SSGH G +G  LG +H   RGH + GHYR A  RR  GCLGAFV  G
Sbjct 1766870     RYGYRGHSSSHGHGAGFLG--LGAH----RGHDGRHGHRHAAHRRGFGCLGAFVGVG 1766709

Query 78          LAGAGVMGLVSLIA 91
                  L GA V G++SL+A
Sbjct 1766708     LVGASVTGVLSSLA 1766667

```

**Further analysis reveals the following non-annotated Dgeo protein:**

MSGFSGGSFSGHSHSHGRYGYRGHSSSHGHGAGFLGLGSAHRGHDGRHGHRHAAHRRGFGCLGAFVGVGLVGLASVTGVLSSLA

```

Dgeo              MSGFSGGSFSGHSHSHGRYGYRGHSSSHGHGAGFLG-----LGAHRGHDGRHG
Deima_0925        MSGFSGGSFSGHSHSHGRGARGFRGHSSSHSHSGHR-----YGHRGH
Deide_15148       MSGFSGGGFS--FSRSSHGRGGFFA--HSRSSHGRGGMVGGLLGHSSSHSGRRGHYVQGGH
DGo_CA2041        MSSHSGRGFFGHSRSSHGRGGFVSRGHSSSHSGHRRGMMGGLMGGSSSGHRGHYAQGGH
                **..** .*          .  :*      **:* .* *                : **

```

```

Dgeo              YRHAHRRGFGCLGAFVGVGLVGLV---ASVTGVLSSLA
Deima_0925        ARHVVR--GCLGAFVVGAVLSGAVAAVGGVFALLA
Deide_15148       YRQAKRRRSSGGCLGAFVLTAGLAG---AGVMGLVSLIA
DGo_CA2041        FRPQQR--GLGCLGVFVGAALLG---GGVAGLVSLVA
                *   :*   ****.*:* ..: .   ..* *:.:.*:*

```

Amino acid composition of the cytoplasmic domain:

For the cytoplasmic domain only :

Number of amino acids: 67

Molecular weight: 7031.6

Theoretical pI: 12.37

Amino acid composition:

|                |          |              |                |           |              |
|----------------|----------|--------------|----------------|-----------|--------------|
| Ala (A)        | 2        | 3.0%         | <b>Arg (R)</b> | <b>10</b> | <b>14.9%</b> |
| Asn (N)        | 0        | 0.0%         | Asp (D)        | 0         | 0.0%         |
| Cys (C)        | 0        | 0.0%         | Gln (Q)        | 2         | 3.0%         |
| Glu (E)        | 0        | 0.0%         | <b>Gly (G)</b> | <b>19</b> | <b>28.4%</b> |
| <b>His (H)</b> | <b>7</b> | <b>10.4%</b> | Ile (I)        | 0         | 0.0%         |
| Leu (L)        | 2        | 3.0%         | Lys (K)        | 1         | 1.5%         |
| Met (M)        | 2        | 3.0%         | Phe (F)        | 5         | 7.5%         |
| Pro (P)        | 0        | 0.0%         | <b>Ser (S)</b> | <b>13</b> | <b>19.4%</b> |
| Thr (T)        | 0        | 0.0%         | Trp (W)        | 0         | 0.0%         |
| Tyr (Y)        | 2        | 3.0%         | Val (V)        | 2         | 3.0%         |

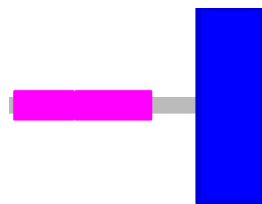

**Deide\_19985** conserved protein of unknown function (67aa)

MDLDSWTPDDNARRLATLIATAVGVVTFVALWLGASLHALLGLVLGAVLGVVVVFIARRLLVSWFRR

Blastp: only several homologs (35-50%) in *Deinococcus*

```
Deide_19985      -----MDLDSWTPDDNARRLATLIATAVGVVTFVALWLGASLH
Deipr_0048      -----MSAMDFNSWRPEDTARRFAIMFATSLGTFGWLAAWLAYGQN
DGo_PC0138      -----MDLNSWTPVDKARRWAVLVAGYLACFILLAVWLGWLNWP
Deide_3p01320   -----MDLESWTPKDKARRLAVLVALYLSTMLMVVSVLALKWP
DR_1299         -----MAQGVTMNLDSWTPDKARRLATLIAAYLATSAGLIAALGLHWP
Deipe_2825      MGHWPAALTLHCRSSPERAGGSVDLDSWKPSDVYRRVSIASVQLGIFVALALVMGFVGP
                ::::** * * ** : .: .: : .:
```

```
Deide_19985      ALLGLVLGAVLGVVVVFIARRLLVSWFRR--
Deipr_0048      VWIGLLAGVAVAAVLYWPLYLILRQVFR--
DGo_PC0138      WWLSLIAGIAGYFCTFYVVFTLLRSLFR--
Deide_3p01320   WVVAPLVGAVGYAVAFYVAYAILRNTFR--
DR_1299         WYLALLSVLVLYGVLYVVVYAVLKAVFRA--
Deipe_2825      WWLWPLGVLLAAVLHWGAQRWYALRHRRSR
                :.                               .*
```

---

**Deide\_20865** protein of unknown function, partial (72aa)

VPPATPGPEMPHSREWYARLARELGGYRLPWTRVLSGPDPELTFDQKAQCHRKWTEVGVVVRTAIPKAQLHI

Blastp: hits with larger proteins

```
Deide_20865      VPPATPGPEMPHSREWYARLARELGGYRLPWTRVLSGPDPELTFD-----QK
DR_0468         -----MNHSRESYDRLARELGGYRHPWARVLSGPDPELTFDLWLSRLLTPQTRVLE
DGo_CA2682      -----MSDLPHSRAWYARLREQSVYAHWPWRVLSGPDPEEFTFDGLLAALLTPQAQVLE
                : *** * **.*. * ** ***** ** :
```

```
Deide_20865      AQCHR-----KWT-----EVGVVVRTAIPKAQLHI-----
DR_0468         AGCGHGPDAARFGPQAARWAAAYDFSPELLKLANAPHADVYEWNGGELPAGLGA...
DGo_CA2682      AGCGHGPDAARFGARAARWVAYDFVPEWVAAAQANAPHAEVHLWDGRGEVPAPLRG...
                * * :           :*. *      : : *:::
```

```
Deide_20865      -----VPPATPGPEMPHSREWYARLARELGGYRLPWTRVLSGPDPELTFD-----
DR_0468         -----MNHSRESYDRLARELGGYRHPWARVLSGPDPELTFDLWLSRLLTP
DGo_CA2682      -----MSDLPHSRAWYARLREQSVYAHWPWRVLSGPDPEEFTFDGLLAALLTP
Deima_1024      -----MSALTPHSREWYAALAARTGGYVHPWRQTLAGPSGEALFDALLEPLLTP
B14911_25565    ----MTKLTSIQGWLAPHSIEWEQLGKLEGKYLIPWDSFINEPNGESIFDS-EAEELSV
PaelaDRAFT_3864 MSIKWFNPKTHTDWRPHSIEWYAQLGRLTGQYSYSWKSTITEPNGELIFTN-EVSQMVP
Deipe_2589      -----MTGKTEAGRAWSDDIARRPGYSVTWTQWVEGPDQAIFDA-LVFDRTA
                .           :. . * . * : * . : *
```

```
Deide_20865      ----QKAQCHR-----KWT-----EVGVVK---RTAIPKAQLHI-----
DR_0468         QTRVLEAGCGHGPDAARFGPQAARWAAAYDFSPELLKLA---RANAPHADVYEWNGK...
DGo_CA2682      QAQVLEAGCGHGPDAARFGARAARWVAYDFVPEWVAAA---QANAPHAEVHLWDGR...
Deima_1024      DTRVLEAGCGHGVDAARFAPRVAHWTGYDFTPASLVRA---QRDVPGATFVEWDS...
B14911_25565    NQKVLVDVGCCEGRFTMHFASFKEIVGVDASEAFIMEG---HRQMPNVVFINANT...
PaelaDRAFT_3864 GKVLVDIGCGHGEFALQWSPVVKHIVGIDITSDFIKQG---NDAGRHNVTFITANT...
Deipe_2589      GKIALDCGCGDGAFTLAVARGASSVTGIDFSEGMLAHARVLAERGMQNVVVFVHAH...
                . *                               .
```

**Deide\_23068** conserved protein of unknown function (61aa)  
MTDDQKKPQGHDPAEQSPAEGQSHAIPDAAQGKNPGVDPAAKGAPAEGRDEVEGSSTPGQ

Blastp: several "good" (50%) homologs in *Deinococcus* only  
Tblastn: more hits, see below

```

Deide_23068 -----MTDDQKKP-----
Dgeo_2289   MKHPMNSMTPSTRKAPVLSGHPKSGPGRRGGEVLSSSHSSGLQDRPVQRRSESPSRDGL
Deima_0533 -----MTDETKQQ-----
Deipe_1333 -----MTHPDERP-----

```

```

Deide_23068 -----QGHDPAEQSPAEG-----
Dgeo_2289   LPLNKPSRESRLGRACRQAHV[SDDSKKPYDPANTAPAEGQSHPIPPQDQGNAPNFDPA
Deima_0533 -----NLPDPADKEQAEG-----
Deipe_1333 -----AEQHDPADTSPADG-----
                :   ***:   *:*

```

```

Deide_23068 -----QSHAIPDAAQGKNPGVDPAAKGAPAEGRDEVEGSSTPGQ-----
Dgeo_2289   NASPAEGQSHPIPPQDRGQNPQVDPAAKDQPAEGSRDDGLPGASTPTASRE
Deima_0533 -----DRQDTPTQDQGSPhVDPAMNREPAEGGRDEVEGQNG-----
Deipe_1333 -----GNDRNISPNERGQSPHIDPADKDQPAEGGRSEGAAGS-----
                : : . :*:* :*** : ****.*:

```

**tblastn:**

*Deinococcus gobiensis* I-0, complete genome

Features:

hypothetical protein

```

Query 1      MTDDQKKPQGHDPAEQSPAEGQSHAIPDAAQGKNPGVDPAAKGAPAEGRDEVEGSSTPG 60
             M+DD KK G+DPA SPAEGQS IP+ +GK P DPAAK PAEGGRDEVEGSSTPG
Sbjct 43089  MSDDPKK--GYDPANTSPAEGQSRPIPEEDRGKAPNADPAAKDEPAEGGRDEVEGSSTPG 43262

```

*Deinococcus radiodurans* R1 chromosome 1, complete sequence

Features:

21 bp at 5' side: endonuclease III

84 bp at 3' side: conserved hypothetical protein

```

Query 1      MTDDQKKPQGHDPAEQSPAEGQSHAIPDAAQGKNPGVDPAAKGAPAEGRDEVE 54
             M+DDQKK G+DPA QSPAEGQSHAIP +GK+P +DPAAK PAEGGR+E E
Sbjct 2439859 MSDDQKK--GYDPANQSPAEGQSHAIPAQDRGKPNIDPAAKDQPAEGGREEAE 2439704

```

**Further analysis reveals the following entire non-annotated proteins:**

Dgob MSDDPKKGYDPANTSPAEGQSRPIPEEDRGKAPNADPAAKDEPAEGGRDEVEGSSTPGA

Drad MSDDQKKGYDPANQSPAEGQSHAIPAQDRGKPNIDPAAKDQPAEGGREEAEDGAQQSS

```

Deide_23068 -----MTDDQKKPQGHDPAEQSPAEGQSHAIPDAAQ-----GK
Dgeo_2289mod ---MSDDSKKPYDPANTAPAEGQSHPIPPQDQGNAPNFDPANASPAEGQSHPIPPQDRGQ
Deima_0533 -----MTDETKQQNLPDPADKEQAEGDRQDTPTQDQ-----RGQ
Deipe_1333  MTHPDERPAEQHDPADTSPADGGNDRNISPNE-----RGQ
Dgob        ---MSDDPKKGYDPANTSPAEGQSRPIPEED-----RGK
Drad        ---MSDDQKKGYDPANQSPAEGQSHAIPAQD-----RGK
                . :   ***:   *:*

```

```

Deide_23068 -----NPGVDPAAKGAPAEGRDEVEGSSTPGQ-----
Dgeo_2289mod -----NPGVDPAAKDQPAEGSRDDGLPGASTPTASRE
Deima_0533 -----SPHVDPAMNREPAEGGRDEVEGQNG-----
Deipe_1333  -----SPHIDPADKDQPAEGGRSEGAAGS-----
Dgob        -----APNADPAAKDEPAEGGRDEVEGSSTPGA-----
Drad        -----DPNIDPAAKDQPAEGGREEAEDGAQQSS-----
                *   *** :   ****.*:

```

**Deide\_2p00483** conserved protein of unknown function (49aa)  
MTKKKTGTTSPRVAKKASELLSNPKSAAKVKVSAASALANAADKPKQKK

Upstream of Deide\_2p00480 (integrase).  
Blastp: several homologs of similar size.  
tblastn: no more hits.  
Looks bit like N-terminus of HU (also histones among blastp hits).  
In some others, gene adjacent to phage-associated genes.

```
Deide_2p00483      ---MTKKKTGTTSPRVAKKASELLSNPKSAAKVKVSAASALANAADKPKQKK-
BN541_00580       -----MGKNEKTS PKVASIASELLRNPKTPKKVKTVAASALTOADKKKSKK-
Dsui_1484         -MSSKKPTNEHTSARVASTAAKLLSNRPTPASVKVSAASALTOQASSSKAKGK-
OR214_01714      -MSSKKPTNEQTSARVASTAAKLLSNRPTPASVKVSAASALTOQKASPSKSKGK
TIB1ST10_08240   ---MDTRNTKQTSRPVAKKASALLRDGRTSAKTKSVAASALAQAKPRKGGK---
HMPREF9949_1121  ---MDTRNTKQTSRPVAKKASALLRDGRTSAKTKSVAASALAQAKPRKGGK---
CDVA01_2128      MTQLAKQNSKQTS PNVARKASALLRDGRSSARTKSVAASALAQARPKRRK---
MHB_29408        -----MAKDEKTNESVASKAALLADPTTPPDVKVSAASALTOADKPKK---
                  .  * .  ** * : * : : . . * : * * * * * : :
```

Number of amino acids: 49  
Molecular weight: 5066.9  
Theoretical pI: 10.69  
Amino acid composition:

|                |           |              |                |           |              |
|----------------|-----------|--------------|----------------|-----------|--------------|
| <b>Ala (A)</b> | <b>10</b> | <b>20.4%</b> | Arg (R)        | 1         | 2.0%         |
| Asn (N)        | 2         | 4.1%         | Asp (D)        | 1         | 2.0%         |
| Cys (C)        | 0         | 0.0%         | Gln (Q)        | 1         | 2.0%         |
| Glu (E)        | 1         | 2.0%         | Gly (G)        | 1         | 2.0%         |
| His (H)        | 0         | 0.0%         | Ile (I)        | 0         | 0.0%         |
| Leu (L)        | 3         | 6.1%         | <b>Lys (K)</b> | <b>12</b> | <b>24.5%</b> |
| Met (M)        | 1         | 2.0%         | Phe (F)        | 0         | 0.0%         |
| Pro (P)        | 3         | 6.1%         | <b>Ser (S)</b> | <b>6</b>  | <b>12.2%</b> |
| Thr (T)        | 4         | 8.2%         | Trp (W)        | 0         | 0.0%         |
| Tyr (Y)        | 0         | 0.0%         | Val (V)        | 3         | 6.1%         |

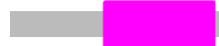

---

**Deide\_2p01755** conserved membrane protein of unknown function (92aa)  
MNPVREWNWKGAWLLGALLLVVLYQLSGTHLEAYQVELSLISMILMVLYATDRTFVLWRRGDYRMALGNAFFC  
TVALMLQARSLMMVRS

Blastp: only one homolog  
Tblastn: no other hits

```
Deide_2p01755      MNPVREWNWKGAWLLGALLLVVLYQLSGTHLEAYQVELSLISMILMVLYATDRTFVLW
Deide_15680        MNPVQEWKWKGGAWLLGALLLVVLYQLSGTHLEAYQVELSLISMILMVLYATDRTFVLW
                  ****:*:*:*:*:*:*:*:*:*:*:*:*:*:*:*:*:*:*:*:*:*:*:*:*:*:*:*
Deide_2p01755      RRGDYRMALGNAFFCTVALMLQARSLMMVRS
Deide_15680        RQGDHRMALISAGIMAVVLLRAFSLVMYRY
                  *:*:*:*:* * * : : * : * : * * * * * * *
```

---

**Figure S7. New proteins detected by proteomics.** New gene labels are mentioned. Tryptic or chymotryptic peptides are indicated. Transcription start site, when found, is mentioned. Results of BLASTP and TBLASTN (if any) and alignments are shown.

**Deide\_05864** conserved protein of unknown function (76aa)  
MLTVKMHLAGGDIIALNMTSPQKNRLSKTINQAQLPTLPFTANVDGVDVEIPWRSISYISSYPQVQSSPVLREAM

Detected peptides: **TINQAQLPTLPFTANVDGVDVEIPWR**, **MHLAGGDIIALNMTSPQK**, **TANVDGVDVEIPW**, **SKTINQAQLPTLPF**.

Transcription start at -6 of start codon.

Blastp: only one homolog, Dgeo\_2254

Tblastn: two additional homologs in *D. deserti*: new predicted Deide\_05654 (no identified TSS), unpredicated Deide\_11206 (TSS at -6 as for Deide\_05864).

```
Deide_05864      MLTVKMHLAGGDIIALNMTSPQKNRLSKTINQAQLPTLPFTANVDGVDVEIPWRSISYIS
Deide_11206      MLSVKLHLAGGDVIALNMTLSQKNRISRTMNQNLPTTPFTTQVNGLDIEIPWRSIAYLS
Deide_05654      MLTVHLHLAGGDTIALEMSPSQKDRLSRTINQEKLPPLPFVAAINGMTVEIPWRSIAYLS
Dgeo_2254        MLTLNLHLKNGDVVAIQVTSSQRDRISRTLNQAVLPTPFVAVAGGTLMIPWRSIGYLS
                *:::*.**.* :*:::: **::*:**:* ** . ** . : * : *****.*:
```

```
Deide_05864      SYPQVQSSPVLREAM-----
Deide_11206      SGPQVQLAQMQQEAAD-----
Deide_05654      SCPQVPN--VALEAAD-----
Dgeo_2254        TQAQAEPELRATEADCFPVCCRLVPGRVSPAGGVVAALVRRG
                : .*          ***
```

One detected peptide (low score) for Deide\_11206: **TTQVNGLDIEIPW**

**Deide\_13059** protein of unknown function (90aa)  
MPILVVTTSSKGRHTY**RGSQEVLOEY**VDTYQIF**SSSGGNILEF**NNSDPNQPSDQISMNIITSMVIHPDDLQSVPEPITDAMVDNAMDKK

Detected peptides: **SSSGGNILEF**, **RGSQEVLOEY**, **RGSQEVLOEYVDTY**.

Transcription start at 1st nt of start codon.

Blastp: no hits

Tblastn: no hits

**Deide\_1p00482** protein of unknown function (69aa)  
MDEHQVQPY**VEALQERGCLVTQHPDGRYSVTLPDGETIEPGAPSVHPQTPW**SALIEACSR**LNVTVPFGE**

Detected peptides: **LNVTVPFGE**, **SVTLPDGETIEPGAPSVHPQTPW**, **VEALQERGCL**, **VEALQERGCLVTQHPDGRY**.

Transcription start at 1st nt of start codon.

Blastp & tblastn: nothing

**Deide\_2p01542** protein of unknown function (113aa)  
MERPDEVNGLTFNAQRDHDGFRHVEAGFPMPLRPVF**ALLGQADRSPAHEETTRSSLL**KQLRDLKTTAPEAFSKETSGFLTATF**MTNVSPEDIFYNRLL**TFLVEAYRKHATSD

Detected peptides: **MTNVSPEDIFYNRLL**, **ALLGQADRSPAHEETTRSSLL**

Transcription start at 1st nt of start codon.

Blastp & tblastn: nothing



(Figure S7, continued)

**Deide\_15253** conserved exported protein of unknown function (158aa)  
**MKTL**LVTLALLSAPVAYAQTDTTTPETATETTTDVTGTETTGTDTTGTDTTAGTDAATDAMGTDTTETDA  
TDATGTETDTTDTATETTTETTTETATDADAATTTSGTTVTETENR**SGFPWGLLGLLGLAGLAGR**NRATHAHTTT  
QTTQTTRR

Detected peptides: **SGFPWGLLGLLGLAGLAGR**, **MKTL**  
Blastp: hits with DR\_2344 (78/167 = 46%) and Deima\_0987 (81/186 = 43%)  
(DR\_2344 probably too long: start at MKK.. gives predicted signal peptide).  
Tblastn: nothing

```
Deide_15253      -----MKTLVTLALLSAPVAYAQTDTTTPETATETTTDVTGTETTGTDTTGTDT
DR_2344          MGFPLELTHQPDKETMKKSILALTILLGSVAYAQDTGTTTTDTSTTTTDTTGTGTTDTTGTG---
Deima_0987       MRHRLTLALTLALAPALATVRGPSTLHFTQSTDTGTTTGTDTGTTGTTDTSTGTGTTDTT
                :      *: : .. :      * . : : * * . . . . . * : *

Deide_15253      TGTDTAGTDAATDAMGTDTTETDADA-----TGTETDTTDTATETTTETTTETATD
DR_2344          -TDTTGTDTTGTDTSGTTTDTSTTDT-----TSTDTDTNVQNDAVTTSTEADGVPG
Deima_0987       TGTDSAGTTTETAPGTGDDASSATGTDGTGTGTGTTGTTDTTSTGTTDTTGTDTATDTSN
                **::** : : * : : ** :      * . * . . . . . : : : .

Deide_15253      DAATTTSGTTVTETENRS-----GFPWGLLGLLGLAGLAGRN
DR_2344          NEKEPAG-----FPWGLLGLLGLAGLMNRG
Deima_0987       SSAGNGGAIPTPTTTGTNGTVATVNSGNASTNPSDDNNGRGPFPWGLLGLLGLAGLAGRR
                . . . . . ***** ** . *

Deide_15253      RATHAHTTTQTTQTRR-----
DR_2344          RPQPTPVVHTTTTEPRRDTTVVVTGTTTTNNDPNRR
Deima_0987       R--HDTVVTPTRNDV-----
                * . . * *
```

**Deide\_12656** conserved exported protein of unknown function (70aa)  
MTKLLKLLAFSAVLALPVNAGAQTNTTETTTNIEMNER**GTDWGWLGLAGLLGLAGLAGR**RHVETSTVRR

Detected peptide: **GTDWGWLGLAGLLGLAGLAGR**  
Transcription start at 1st nt of start codon.  
Blastp: several hits (note conserved Cter corresponding to detected  
peptide, which is present in many more homologs of similar size)

```
Deide_12656      -----MTKLLKLLAFSAVLALPVNAGAQTNTTETTTN-----
Dgeo_1211        -----MTRVLKALTLTALLALPVSAQAQDTTTTTTATT-----
DR_1067          -----MKLLKTVAVVAALALPVAASAQDTNNTGTTQTT-----
Deipr_2033       -----MKKATYLLLLTGLLAAPITASAQTETTTSETTTSTTSTPETT
N9414_23183      -----MTRNFTKAVGAGFLTSLMAMPLTLPVNAQVT-DPRVE-T--T---
Ava_2326         -----MNRDFSKTVGAAVITLSMATLPLSLPANAQVQTAPRTDGTTR---
FJSC11DRAFT_0576 -----MMKNLTKMVGASVLTLMGTILPLTIPAAQQTTPDPTIN-NPNP
asr5071          -----MKRDFSKTVGAAVLSLSMATLPLSLPANAQVQTAPGTDGTTIR---
Npun_F0452       MVSNFGWHKELSQLMKNFITAAGAGILTLGILPLTLQAQTTTDPGAN-T--A---
Deima_0510       -----MTQRMKHTLLALTLFAATPAFAQDTTTTGTDTGTTQT-----
                . . . . .

Deide_12656      ---IEMNERGTDWGWLGLAGLLGLAGLAG-----RRHVETSTVRR---
Dgeo_1211        ---TTTN--GFDWGWLGLAGLIGLAGLAG-----GSRRYVDTAPGRR---
DR_1067          -TTTTTEKRGFDWGWLGLLGLAGLLGLGRQO-----PAPT VHTTTTTRR---
Deipr_2033       TTTVERENDGFDWGWLGLLGLAGLAGRRREPEHVVRTAPVHTTPTQTHTTTTHTNDTTR
N9414_23183      PRTTYERRDFDWGWLGLIGLFLGLAGLAGRKRK-----EPTAYREPTTPGSTTY
Ava_2326         TYDRADRNDFDWGWLGLIGLFLGLAGLAGKRD-----DEPTRYRDPSPAGASSY
FJSC11DRAFT_0576 PNTGVYDRGFDWGWLGLLGLLGLAGLAGRKR-----DEPTRYRDPNAVGSSTY
asr5071          TYDRADRNDFDWGWLGLIGLFLGLAGLAGKRD-----DEPTRYRDPSPAGASSY
Npun_F0452       PRTTYDRNDFDWGWLGLLGLFLGLAGLAGKRD-----NEPTAYRDPNAPGATY
Deima_0510       TTNNNDNDGFDWGWLGLLGLLGLAGLRROE-----PPREVHLGGPTDGP RR-
                . ***** ** ** *

Deide_12656      --
Dgeo_1211        --
DR_1067          --
Deipr_2033       R-
N9414_23183      RD
Ava_2326         RE
FJSC11DRAFT_0576 RE
asr5071          RE
Npun_F0452       RD
Deima_0510       --
```

**Deide\_3p02615 (Deide\_23165)** conserved protein of unknown function (78aa)  
MREFNSVTAFFGDLAVPGRIEALLEGGRGLMRVSLNGAPDISEGAEAIEMHDGVRFRVAVTERLDDTNEVRMKLLARS

Detected peptides: VAVTERLDDTNEVR, MREFNSVTAFFGDLAVPGRIEALLEGGR, FGD LAVPGRIEAL, FGD LAVPGRIEALLEGGRGL

Blastp: two homologs, Deima\_0424 & Deipe\_2626  
Tblastn: one almost identical protein (76/78 = 97%) in *D. deserti* itself (= new Deide\_23165); RNAseq indicates better expression of *Deide\_23165* than *Deide\_3p02615*.

Deide\_3p02615 MREFNSVTAFFGDLAVPGRIEALLEGGRGLMRVSLNGAPDISEGAEAIEMHDGVRFRVAV  
Deide\_23165 MREFNSVTAFFGDI AVPGRIEALLEGGRGLMRVSLNGAPDISEGAEAIEMHDGVRFRVAV  
\*\*\*\*\*:\*\*\*\*\*

Deide\_3p02615 TERLDDTNEVRMKLLARS  
Deide\_23165 TERLDDTNEVRMKLLARA  
\*\*\*\*\*:

Deide\_3p02615 -----MREFNSVTAFFGDLAVPGRIEALLEGGRGLMRVSLNG---A  
Deide\_23165 -----MREFNSVTAFFGDI AVPGRIEALLEGGRGLMRVSLNG---A  
Deima\_0424 -----MTNPQAF TAHF GDTAVPGEIQALEGRGGYMRVHLRAG--S  
Deipe\_2626 MNLFPPWRHFPATKTGYGDGVTDPNSITAHFDEVSIPATITALEGGGGYMRVTLNWQNTA  
: : : : \* . \* : : \* . \* \* \* \* \* \* \* \* \* : :

Deide\_3p02615 PDISEGAEAIEMHDGVRFRVAVTERLDDTN----EVRM KLLARS--  
Deide\_23165 PDISEGAEAIEMHDGVRFRVAVTERLDDTN----EVRM KLLARA--  
Deima\_0424 VPTAEGTPCELEMHDGARFRMVI TEDLGAGPGARNVRLKLVGRGE-  
Deipe\_2626 FSPAPGMESELEMHDGGRFRVTLLEQITDTGKTSAEFRM KLLGRGRG  
: \* . \* \* \* \* \* \* \* \* : : \* : \* : . : : \* \* : \* .

**Deide\_11207** protein of unknown function (70aa)  
MDISQVVRATAHHLFKLYWAMFANIENPEEALASAGQAVLLYLDDCGMPAQEAAML RDEIMLSIPPTRKM

Detected peptide: ANIENPEEALASAGQAVLL  
Transcription start at 1st nt of start codon.  
Blastp & tblastn: no good hits

**Deide\_14224** conserved protein of unknown function (90aa)  
MTAGLTGPQARVLGALRDGAALIMHTRTERGAFYTLGRRRLSVTLLKDLERLRYVRSAGAGRTAVAYELTPGGS  
AALAQWESGNPASRG

Detected peptide: TAVAYELTPGGS AALAQWESGNPASRG  
Blastp: two homologs, Deima\_2324 & Deipe\_1712  
Tblastn: no other good hits

Deide\_14224 MTAGLTGPQARVLGALRDGAALIMHTRTERGAFYTLGRRRLSVTLLKDLERLRYVRSAG  
Deipe\_1712 MSVKASEHQVRVLKALRAGGLVMHTRGERGPYYTL DGRWLSVTLVKGLEAARLIQREGS  
Deima\_2342 -MPTLLTDAQARVLQALQDGAALTMHARGDRGPYYTLNGRRLSMPLVKSLEANRWIEREGA  
: \* . \* \* \* \* \* \* \* : \* . \* \* \* \* \* \* \* \* : \* . \* \* \* \* \* \* \* \* \* : \* . \* . . .

Deide\_14224 AGRTAVAYELTPGGS AALAQWESGNPASRG----  
Deipe\_1712 SGRVVASYQLTPAGESALAEWEAVRPPLTSEERR  
Deima\_2342 GRGAASAYQLTAEGESALQAWAAPTTPPTH----  
. . . : \* : \* . \* . \* \* \* : \* .

**Deide\_3p02814** protein of unknown function (142aa)  
LTRVPEKTLRRTLGRGRHRHPQKIILLIQGSALSAQNLOTLAIRALTANRLEQRVV LQAISDNLSVQTIKANLSD  
LKVVAQVLLGLLQAKTQFIFSIQHGRHLRSCSTPENLKRIEHALDEFVRVDRGLVTLTQSKATPLGN

Detected peptide: IQGSALSAQNLOTL  
Blastp & tblastn : no good hits

C\_571026\_3

ORF opposite of Deide\_04940 (gcvP, glycine dehydrogenase)

In figure below, Deide\_04940 to Deide\_04960 are on reverse strand, ORF C\_571026\_3 is on the forward strand. Deide\_04940 has a potential internal TSS (iTSS) and two potential antisense TSS (aTSS) (one with only few reads). The three peptides in C\_571026\_3 are downstream of these two aTSS. However, antisense reads mainly found with +TEX, without TEX hardly any reads.

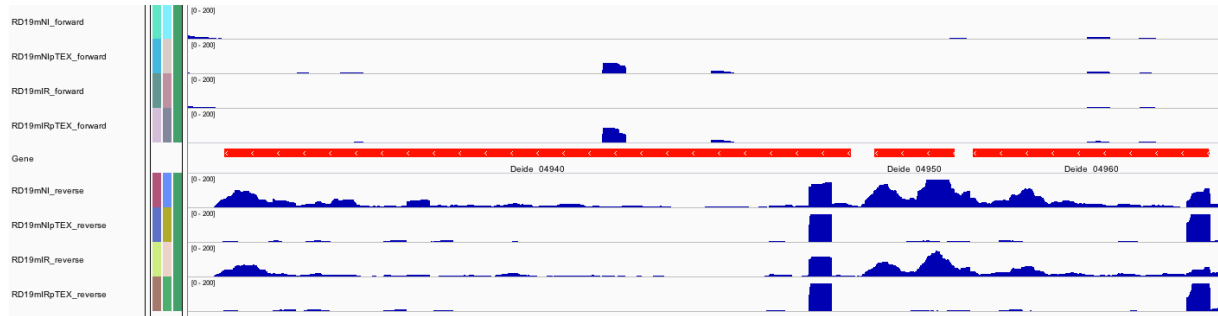

C\_571026\_3 sequence (potential TSS positions, potential start codons and detected peptides):

KKTAPKAFGAVFLNSAGLRADVILNRWAGAHEVAVAVHIVHAVDGRPVLPALLMLLAGVRCFAAVGAVPLVGHQV
VLGVGCVLQRAFLRLQOTVLHLLNLTADLQHGVEAEVLEGLRLGFGGLDHOQTGHREAHGGRVETVVHQPFGDVL
LGDAARLLEGADINDALVRHAVAFSLVQDGVGARELAGNVVGVQQRHLGGLAQAMGAQQFDVQVADREDARAAGV
RGTYGAGLAAADI AHHVVGQERGVSLDPDGAHAGATATVRDGGKLVQVQVRDVTADQTLGHADLCVHVGTQVQ
HLTAVLVDQVAHVDPVDFVHTVVGAGVGDHOGGEVLAVLLGLGGQVVKVDVAVRVGFFHNHHLHAHHGGAGGVGAVC
TGGNQADVPPVLAALAEVLADHQAGVLALCAAVGLHGNRVVAGDVGQPRFQFRQQLGVAFGLVGRGKGVQRPEF
RPGHRDHLGGGIELHGARTQWNHAVNEAVVAVFQHLQVAQHAVLTAVGLEDRVGVQVLTGALEALRNAVHGLGVQR
QHVHSLPGNGFGHVCQISRSHGFVQAHADLVAFIAEVDAGFLRALADSRVTFEGQVEEGYAGRQARVLEGSQ
NAGQAMHAAGNQAQAVGTVHVGVGRGHVGOORLCGADVAGLLTADVLLTGLHGHAQGSAAHVVLADADHAARHG
ALVGLLTRQECVSRSTEHRHAQTLGAAYHDVRRALLAGRGDQCAGQQISCDQCAADCMLHLLGHGRQVAQIAVGP
GILDQHAHEPFRQLGSRVAGHHFEAEVLGAGLDHVQGLRVHVVGVGHEKDVALAFCLTLGQGHGFGGGGAFIQORSV
GDRHASQVHDDLLEVQOHLQTPLTDFSLVRRVGGVPARIFQHVAVQNHRRRVGAVIPHADIAAEHLVLLGDADFQVS
QSLSLGDALAGLQLSAELDGFRRQRFQGLVQAGNAQFGQHICLFRLAGAKVTGSEVVGLKQVRQRFHGTG

Detected peptides : AGAKVTGSEVVGL, GSRVAGHHFEAEVL, QVSQSLSLGDAL

In sequence below, part of Deide\_04940 on reverse strand, part of C\_571026\_3 on forward strand, with indicated potential TSS positions, potential -10 motif, (potential) start codons, and detected peptides

G Q G V E E G Y A G R Q A R V L E G S G F1
1741 GGTCAGGGTGTCAAGAAGGTTACGCTAGGGCGTCAAGGCCCGCGTTCTGGAGGGCTCTGGC 1800
----:----|----:----|----:----|----:----|----:----|----:----|
1741 CCAGTCCCACAGCTTCTTCCAATGCGACCCGAGTCCGGGCGCAAGACCTCCCGAGACCG 1800
T L T D F F T V S P T L G A N Q L A R A F4
Q N A G Q A M H A A G N G A Q A V G T V F1
1801 CAGAATGCCGGTCAGGCGATGCACGCGGCCGCAATGGTGCAGGCGCGTCCGGCACCCGTG 1860
----:----|----:----|----:----|----:----|----:----|----:----|
1801 GTCTTACGGCCAGTCCGCTACGTGCGCCGCGTACCACGCGTCCGGCAGCCGTGGCAC 1860
L I G T L R H V R G A I T R L G D A G H F4
V H G V G R G H V G Q Q R L C G A D V A F1
1861 GTACACGGCGTAGGCCGCGCCATGTTGGCCAGCAGCGCTGTGCGGTGCAGATGTTGCT 1920
----:----|----:----|----:----|----:----|----:----|----:----|
1861 CATGTGCCGCATCCGGCGCCGTTACAACCGTTCGTCGGACACGCCACGTCTACAACGA 1920
Y V A Y A A A M N A L L A Q A T C I N S F4

(Figure S7, continued)

G G L L T A D V L L T G L H G H A Q G S F1  
1921 GGTGGCCTTCTCACGGCGGATGTGCTGCTCACGGGTCTGCATGGCCATGCGCAGGGCAGT 1980  
----:----|----:----|----:----|----:----|----:----|----:----|  
1921 CCACCGGAAGAGTGCCGCCTACACGACGAGTGCCAGACGTACCGGTACGCGTCCCCTCA 1980  
T A K E R R I H Q E R T Q M A M R L A T F4

L A A H V L A D A D H A A R H G A L V G F1  
1981 CTTGCCGCGCACGTCTTGCTGACGCCGATCACGCGGCCCGGCATGGAGCGCTGGTAGGC 2040  
----:----|----:----|----:----|----:----|----:----|----:----|  
1981 GAACGGCGCGTGCAGGAACGACTGCGGCTAGTGCGCCGGGCCGTACCTCGCGACCATCCG 2040  
K G R V D K S V G I V R G P M S R Q Y A F4

L L T R Q E C S V R S T E A H R H A Q T F1  
2041 CTCCTGACACGCCAGGAATGCAGCGTCCGGTCCACCGAAGCCCATCGGCACGCCAGACG 2100  
----:----|----:----|----:----|----:----|----:----|----:----|  
2041 GAGGACTGTGCGGTCTTACGTGCGCACGCCAGGTGGCTTCGGGTAGCCGTGCGGGTCTGC 2100  
E Q C A L F A A H P G G F G M P V G L R F4

L G A A Y H D V R A L L A G R G D Q C A F1  
2101 CTGGGCGCTGCCTACCACGATGTCCGCGCCCTGCTCGCCGGGAGGGGTGACCAGTGC GCA 2160  
----:----|----:----|----:----|----:----|----:----|----:----|  
2101 GACCCGCGACGGATGGTGCTACAGGCGCGGGACGAGCGGCCCTCCCCACTGGTCACGCGT 2160  
Q A S G V V I D A G Q E G P P T V L A C F4

G Q Q I S C D D Q C A A D C M H L L G H F1  
2161 GGCCAGCAGATCAGCTGCGACGATCAGTGCGCCGCCGACTGCATGCACCTTCTCGCCAT 2220  
----:----|----:----|----:----|----:----|----:----|----:----|  
2161 CCGGTCTGTCTAGTGCAGCTGCTAGTCACGCGCGGCTGACGTACGTGGAAGAGCCGGTA 2220  
A L L D A A V I L A G G V A H V K E A M F4

G R Q V A Q I A V G P G I L D Q H A E H F1  
2221 GGGAGACAGGTGCGCGCAGATCGCCGTAGGTCCCGGGATACTGGACCAACACGCCGAACAC 2280  
----:----|----:----|----:----|----:----|----:----|----:----|  
2221 CCCTCTGTCCAGCGCTCTAGCGGCATCCAGGGCCCTATGACCTGGTCTGCGGCTTGTG 2280  
P S L D R L D G Y T G P Y Q V L V G F V F4

P F R Q L G S R V A G H H F E A E V L G F1  
2281 CCCTTCAGGCAGCTCGGCAGTCGGGTGCGCCGGTACCACCTTCGAAGCCGAAGTACTCGGC 2340  
----:----|----:----|----:----|----:----|----:----|----:----|  
2281 GGAAGTCCGTCGAGCCGTCAGCCAGCGGCCAGTGGTGAAGCTTCGGCTTCATGAGCCG 2340  
G E P L E A T P D G T V V E F G F Y E A F4

A G L D H V Q G L R V H V V G H E K D V F1  
2341 GCGGGTCTTGACCACGTCCAGGGTCTGCGGGTGCACGTGCTCGGCCATGAAAAAGACGTT 2400  
----:----|----:----|----:----|----:----|----:----|----:----|  
2341 CGCCAGAACTGGTGCAGGTCCCAGACGCCACGTGCAGCAGCCGGTACTTTTCTGCAA 2400  
R T K V V D L T Q P H V D D A M F F V N F4

A L A F C L T L G Q G H G F G G G G A F F1  
2401 GCCCTTGCTTTTTGCTGACGCTTGCCAGGGTTCATGGCTTCGGCGGCGGCTGCCTTC 2460  
----:----|----:----|----:----|----:----|----:----|----:----|  
2401 CGGAACGAAAACGGACTGCGAACCGGTCCCAGTACCGAAGCCGCCGCCACGGAAG 2460  
G K S K A Q R K A L T M A E A A A T G E F4

I Q Q R S V G D R H A S Q V H H D L L E F1  
2461 ATCCAGCAGCGAAGCGTTGGAGATCGGCATGCCAGTCAGGTCCATCACGACCTGCTGGAA 2520  
----:----|----:----|----:----|----:----|----:----|----:----|  
2461 TAGGTCTGCTGCTTTCGCAACCTCTAGCCGTACGGTTCAGGTAGTGTGCTGGACGACCTT 2520  
D L L S A N S I P M G T L D M V V Q Q F F4

(Figure S7, continued)

```
V Q Q H L Q T P L T D F S L V R R V G G F1
2521 GTTCAGCAGCATCTCCAGACGCCCTGACTGATTTTCAGCCTGGTACGGCGTGTAGGCGGT 2580
----:----|----:----|----:----|----:----|----:----|----:----|
2521 CAAGTCGTCGTAGAGGTCTGCGGGGACTGACTAAAGTCGGACCATGCCGCACATCCGCCA 2580
N L L M E L R G Q S I E A Q Y P T Y A T F4

V P A R I F Q H V A Q N H R R R V G A V F1
2581 GTACCAGCCCGGATTTTCCAGCATGTTGCGCAGAATCACCGGAGGCGTGTGGGTGCCGTG 2640
----:----|----:----|----:----|----:----|----:----|----:----|
2581 CATGGTCGGGCCTAAAAGGTCGTACAACGCGTCTTAGTGGCCTCCGCACACCCACGGCAC 2640
Y W G P N E L M N R L I V P P T H T G H F4

I P H A D I A A E H L V L L G D A F Q V F1
2641 ATACCCCATGCCGATATAGCTGCGGAACACCTTGTCTTCTGGGCGACGCGTTTCAGGTC 2700
----:----|----:----|----:----|----:----|----:----|----:----|
2641 TATGGGGTACGGCTATATCGACGCTTGTGGAACAAGAAGACCCGCTGCGCAAAGTCCAG 2700
Y G M G I Y S R F V K N K Q A V R K L D F4

S Q S L S L G D A L A G L Q L S A E L D F1
2701 AGCCAGAGCCTGAGCCTCGGTGACGCCCTCGCCGCCTTCAGCTCTCCGCGGAAGTGGAT 2760
----:----|----:----|----:----|----:----|----:----|----:----|
2701 TCGGTCTCGGACTCGGAGCCACTGCGGGAGCGCCGGAAGTCGAGAGGCGCCTTGACCTA 2760
A L A Q A E T V G E G A K L E G R F Q I F4

G F R Q R G F G Q L V Q A G N A Q F G Q F1
2761 GGCTTCAGGCAGCGTGGTTTCGGTCAACTCGTCCAGGCTGGAAACGCCAGTTCGGCCAG 2820
----:----|----:----|----:----|----:----|----:----|----:----|
2761 CCGAAGTCCGTCGCACCAAAGCCAGTTGAGCAGGTCCGACCTTTGCGGGTCAAGCCGGTC 2820
A E P L T T E T L E D L S S V G L E A L F4

H I C L F R L A G A K V T G S E V V G L F1
2821 CATATCTGCCTGTTCCGCCTCGCTGGGGCCAAGGTGACGGGCAGTGAAGTCGTGGGTTTG 2880
----:----|----:----|----:----|----:----|----:----|----:----|
2821 GTATAGACGGACAAGGCGGAGCGACCCCCGTTCCACTGCCCGTCACTTCAGCACCCAAAC 2880
M D A Q E A E S P G L H R A T F D H T Q F4

K Q V R Q R F H G T P * F1
2881 AAGCAGGTCAGACAGCGGTTTCATGGAACCTCTAG 2916
----:----|----:----|----:----|----:----|
2881 TTCGTCCAGTCTGTGCGCCAAAGTACCTTGAGGAATC 2940
L L D S L P K M S S R L F4
```

---

**Figure S8. Examples of several highly induced genes encoding small proteins.** Multiple alignments with homologs are shown. For 5 of these *D. deserti* proteins, potential non-annotated homologs in *D. geothermalis* and/or *D. radiodurans* are also indicated. All proteins are of unknown function. Conserved cysteine residues in some of the proteins are indicated.

**Deide\_04721 conserved protein of unknown function (74aa)**

MNRSFRMRRAGSEPAQAFPDSSGRGYRHACPSGQNLTYDLRDGDQAYWCDPCGKGRASDPPPGALQPLPDVS

Blastp & tblastn: no hits with *D. radiodurans* & *D. gobiensis*.

```
Deide_04721 -----MNRSFRMRRAGSEPAQAFPDSSGRGYRHACPSGQNLTYDLRDGD
Dgeo_2035   MDWTPAVRRGNPTSLFCYHQNMKRAFRIKADPSPVSGRGYAHVCPFCGQSLALYDLRDGD
Deima_3010 -----MKRRFRE--DPYPASGRGYVHVCPCTAPMPLYDTRDGD
Deipe_1056 -----MKSRLFSE--D-FPASGRGYEHVCPHCGDLLQLHEMRDGD
Deipr_1808 -----MKQRYVKNVRKNWKEDPYPASGRSYEVCPDCGRTMELHDLRDGD
                .                : * **.* :.* * : * : * **
```

```
Deide_04721 QAYWCDPCGKGRASDPPPGALQPLPDVS
Dgeo_2035   QAYWCGPCGKGRAGELPPGALRPLPEAS
Deima_3010 QAYWCHTCDRGHRASDPPPEALRPLQAG
Deipe_1056 QAYWCQRCERGRAGDLPVQALRPLQTAI
Deipr_1808 QGYWCHGCSHGHRAGOPPLAALRRGDVA
                * .*** * :*****: * **: .
```

with SSDG\_06207 = Predicted protein (100aa) of *Streptomyces pristinaespiralis*:

```
Deide_04721 -----MNRSFRMRRAGSEPAQAFPDSSGRGYRHACPSGQNL-----LTL
Dgeo_2035   MDWTPAVRRGNPTSLFCYHQNMKRAFRIKADPSPVSGRGYAHVCPFCGQS-----LAL
Deima_3010 -----MKRRFRE--DPYPASGRGYVHVCPCTAP-----MPL
Deipe_1056 -----MKSRLFSE--D-FPASGRGYEHVCPHCGDL-----LQL
Deipr_1808 -----MKQRYVKNVRKNWKEDPYPASGRSYEVCPDCGRT-----MEL
SSDG_06207 -----MGEHRKGAAVTDLDDWYRAYRTVYEDASRGRTVACPHCGARSLRLLFVVRN
                :.*. .** * :
```

```
Deide_04721 YDLRDGDQAYWCDPCGKGRASDPPPGALQPLPDVS-----
Dgeo_2035   YDLRDGDQAYWCGPCGKGRAGELPPGALRPLPEAS-----
Deima_3010 YDTRDGDQAYWCHTCDRGHRASDPPPEALRPLQAG-----
Deipe_1056 HEMRDGDQAYWCQRCERGRAGDLPVQALRPLQTAI-----
Deipr_1808 HDLRDGDQGYWCHGCSHGHRAGOPPLAALRRGDVA-----
SSDG_06207 QDDEDGTAAFWCDACLHGLMPTRAPVPPTGERYVKGTESVPDYSLITGD
                : .** .:** * :* . * .
```

**Deide\_05260 conserved protein of unknown function (62aa)**

MNDTEHQSMVGRCDATNCRFNDDMECTAGQIEVQMSGQMAQCITYTPTDGMGESYGATADNR

Tblastn: additional homolog in *D. geothermalis* (see below)

```
Deide_05260 -----MNDTEHQSMVGRCDATNCRFNDDMECTAGQIEVQMSGQMAQCITYTPTDGMGESY
DGo_CA1723 -----MNDTTVSRCDATNCRFNDDMECTAGQIEVSMMSAHQAQCLTFSPAEGDQGOR
Deipe_3565   MTQNDQMGQRQTSIVGACGATDCRYNEDRECHAGQIQVGMAGNMAQCMTYDPTGDQSGMT
Deima_2451 -----MTQDQTSIVGCEAQDCRFNQRERRCHAGQIEVSFSGTQAACMTYSPSGDAQGTG
Deima_2988 -----MTNDTTSIVGCTAEHCRYNEAQRCTAGQIEVSMGGAHAACATFTPTDQTDQ-
                : * . * * **:* . * *****: . * * * : * .
```

```
Deide_05260 GATADNR-
DGo_CA1723 PTAQQ---
Deipe_3565 DMPRVNPS
Deima_2451 EQPQQRQ-
Deima_2988 PQPGTNA-
                .
```

DUF1540 (pfam07561) (Cd Length: 40 Bit Score: 35.27 E-value: 7.15e-05)  
lcl|local\_MNDTEHQSMV 11 GRCDATNCRFNDDMECTAGQIEVQM-----SGQMAQCITY 45  
Cdd:pfam07561 1 VACTVTNCAYNEGNECTADAITVGHgsnatTSEETDCATF 40

**Tblastn on *D. geothermalis*:**

```
123 bp at 5' side: hypothetical protein (Dgeo_0866 = Deide_05250 homolog)
105 bp at 3' side: cation diffusion facilitator family transporter (Dgeo_0867)
Query 1 MNDTEHQ---SMVGRCDATNCRFNDDMECTAGQIEVQMSGQMAQCITYTPTDGMGES 54
      M D HQ S+VGRCDAT+CR N++ EC AGQIEV +SGQMAQC+TYTP +GMG+S
Sbjct 925654 MEDRSHQNQQASIVGRCDATSCRHNENQECHAGQIEVALSGQMAQCITYTPTQEGMGDS 925827
```

Deide\_19965 conserved protein of unknown function (63aa)

MQELACTWVPGTLDIVRLKVGSTSTIELTSTRLARIFGPGQALNDLYLKGRAVVKADARQVAMLA

Among the homologs are new *D. deserti* genes identified in this study: Deide\_3p00225 and Deide\_1p00514.

Tblastn: additional homolog in *D. geothermalis* (see below).

Deide\_19965 -----MQELACT-----WVPGTLDIVRLKVGSTSTIELTSTRLARIFGPGQALNDLY
DGo\_CA2814 -----MQELACT-----WVPGTIDVVRLRLGTRNIELTSTRLGRIFGSQALNDLY
Deide\_3p00225 -----MIEVKCT-----WIPGTLDMLQLRAGNRHGRLSVHELRRRFGMGAMNSMY
Mrub\_0267 -----MQALQQGLVARGGIQC-----EWVPGTMNQVRVYLPDHQVQISLERLQQIAGIDAVHELY
Deima\_1438 -----MTTASHALSVR-----WVPGMTNEVQFMLGQALHRIHLSALHRTFGARSSDRLY
Deima\_1206 -----MKNWQCS-----WVPGMTNVRVQIKGENASTEETTIDKLVRAF GAPILTDLY
Deipe\_2935 -----MSQLQCS-----WVPGTFNRVVRMNSIHDLEITIERAERILGRGSLHDLY
Deipe\_3286 MTQTPAVRFSCA-----WVPATLDRVRVSSPYGTFEVDLQLVRQVLGRPALQALY
Deide\_1p00514 --MTASVSVTCS-----WVPGLDRIRVTCAQHDEVVWHIRDVANRYGREALNALY
Deipe\_0580 -----MTNVLTCR-----WTLGTLDLRVRIITPPWVAGEVHVVAHIVRLLGRNALEGLY
Deipe\_1840 -----MIDTLTCH-----WVPNTVDRVLVVTTHEKAEVHIDRIRRVLGCEALEALY
\* \*.: : . . \* :\*

Deide\_19965 LKGRAVVKADARQVAMLA-----
DGo\_CA2814 LKGRVVLRLANPQQIDLLA-----
Deide\_3p00225 LIGRFQTLAEPGALTGLALS-----
Mrub\_0267 LKGLVCLPCTSSLCEAFDKA-----
Deima\_1438 LQGHMTVQVSSSELRTLLR-----
Deima\_1206 LRGRAVISTERDLLKILA-----
Deipe\_2935 LKGRVTLTVNEDVLQRLSA-----
Deipe\_3286 LQGRYNVEKPELTLRAILDQLGIELAPQTIAPRTASTCEAQSASGLQALDDPGAPRASET
Deide\_1p00514 LKGRYQTHVSRRELLAFP-----FIARTEPKS-----
Deipe\_0580 LRGSYVLDADLWVDT-----QALFS--LESVASAA
Deipe\_1840 LRGHFALSTSGRATSQAM-----QALTASSITFAQAA
\* \*

Deide\_19965 -----
DGo\_CA2814 -----
Deide\_3p00225 -----
Mrub\_0267 -----
Deima\_1438 -----
Deima\_1206 -----
Deipe\_2935 -----
Deipe\_3286 HLKIRPVH
Deide\_1p00514 -----
Deipe\_0580 D-----
Deipe\_1840 D-----

With 3 best blastp hits only :

Deide\_19965 MQELACTWVPGTLDIVRLKVGSTSTIELTSTRLARIFGPGQALNDLYLKGRAVVKADARQVA
DGo\_CA2814 MQELCTWVPGTIDVVRLRLGTRNIELTSTRLGRIFGSQALNDLYLKGRVVLRLANPQQID
Deima\_1206 MKNWQCSWVPGTMNVRVQIKGENASTEETTIDKLVRAF GAPILTDLYLRGRAVISTERDLLK
Deipe\_2935 MSQLQCSWVPGTFNRVVRMNSIHDLEITIERAERILGRGSLHDLYLKGRVTLTVNEDVLQ
\*.: \*:\*\*\*\*\*: \*.:. \* \* : \* : \* \* \*\*\*\*\*:\*.:. : :

Deide\_19965 MLA-
DGo\_CA2814 LLA-
Deima\_1206 ILA-
Deipe\_2935 RLSA
\*:

Tblastn on D. geothermalis:

179 bp at 5' side: a/b hydrolase superfamily protease and regulatory beta pr... = Dgeo\_0365

87 bp at 3' side: peptidase M20 = Dgeo\_0366 (Syntheny with D. deserti)

Query 1 MQELACTWVPGTLDIVRLKVGSTSTIELTSTRLARIFGPGQALNDLYLKGRAVVKADARQVA 60
M EL CTWVPGTLDIVRLKV TIELTSTRLARIFG QALN+LYLKGR +KA+ +QVA
Sbjct 372429 MDELLCTWVPGTLDIVRLKVAGRTIELTSTRLARIFGQALNELYLKGRVTLKANPQQVA 372608

Query 61 MLA 63
+LA
Sbjct 372609 LLA 372617

**Deide\_2p00980 conserved protein of unknown function (64aa)**

MTNERGGSSGSAGGRDPNGDDKTNNGLGDGRRDPGSNHGSPDDREGDGRNRNGSESSEGGGKSQTKD

Tblastn indicates additional homolog in *D. geothermalis* (see below)

```

Deide_2p00980      MTNERGGSSGSAGGRDPNGDDKTNNGLGDGRRDPGSNHGSPDDREGDGRNRNGSESSEGGGKS
DR_A0234           -----MTQAEKKNDPERSHERDNEPKSGGQRDPGDGQPSTDEKNGDGRNRNGSESSEGGGKD
                   :... .   . . . . : * : ..*:****. : *.*.:*****

```

```

Deide_2p00980      QTKD
DR_A0234           GNS-
                   ..

```

with possible homolog YciG of *E. coli*:

```

Deide_2p00980      MTNERGGSSGSAGGRDPNGDDKTNNGLGDGRRDPGSNHGSPDDREGDGRNRNGSESSEGGGKS
DR_A0234           -----MTQAEKKNDPERSHERDNEPKSGGQRDPGDGQPSTDEKNGDGRNRNGSESSEGGGKD
YCI_G_ECOLI        ----MAEHRGGSGNFAEDREKASDAGRKGGQHSGGNFKNPQRASEAGKKGGQOSGGNKS
                   . . . . . : *.:. * . : . : . *.:. *.:. *.:.

```

```

Deide_2p00980      QTKD
DR_A0234           GNS-
YCI_G_ECOLI        GKS-
                   ..

```

with GsiB of *Bacillus* (Glucose starvation-inducible protein B, General stress protein B) (Induction: Glucose or phosphate starvation, and addition of decoyinine. Also by heat shock, salt stress and oxidative stress):

```

Deide_2p00980      -----MTNERGGSSGSAGGRDPNGDDKTNNGLGDGRRD
DR_A0234           -----MTQAEKKNDPERSHERDNEPKSGGQRD
YCI_G_ECOLI        -----MAEHRGGSGNFAEDREKASDAGRKGGQHS
GSIB_BACSU         MADNNKMSREEAGRKGGETTSKNHDKEFYQEIGQKGGEATSKNHDKEFYQEIGEKGGEAT
                   . . . . . : *.:. * . : . : . *.:. *.:. *.:.

```

```

Deide_2p00980      PGSNHGSPDDREGD-----GRRNG-----SESSEGGGKSQTKD
DR_A0234           PGDGQPSTDEKNGD-----GRRNG-----SESSEGGGKD GNS-
YCI_G_ECOLI        GGNFKNDPQRASEA-----GKKGG-----QOSGGNKSGKS-
GSIB_BACSU         SKNHDKEFYQEIGEKGGEATSENHDKEFYQEIGRKGGEATSKNHDKEFYQEIGSKGGNAR
                   . . . . . *.:. * . : . : . *.:. *.:. *.:.

```

```

Deide_2p00980      ---
DR_A0234           ---
YCI_G_ECOLI        ---
GSIB_BACSU         NND

```

**for *E. coli* YciG and *B. subtilis* GsiB:**

Family: KGG (PF10685)

Stress-induced bacterial acidophilic repeat motif.

This repeat is found in proteins which are expressed under conditions of stress in bacteria. The repeat contains a highly conserved, characteristic sequence motif, KGG, that is also recognised by plants and lower eukaryotes and repeated in their LEA (late embryogenesis abundant) family of proteins, thereby rendering those proteins bacteriostatic. An example of such an LEA family is LEA\_5, PF00477. Further downstream from this motif is a Walker A, nucleotide binding, motif GXXXXGK(S,T), that in YciG of *E. coli*, eg Q8X7B4 is QSGGNKSGKS [URL]. YciG is expressed as part of a three-gene operon, yciGFE, and this operon is induced by stress and is regulated by RpoS, which controls the general stress-response in *E. coli*. YciG was shown to be important for stationary-phase resistance to thermal stress and in particular to acid stress.

**tblastn on *D. geothermalis*:**

```

88 bp at 5' side: Uspa
247 bp at 3' side: Rhodanese-like protein
Query 21          DKTNNGLGDGRRDPGSNHGSPDDREGDGRNRNGSESSEGGGK 59
                D+ N G D PG++H D+ GDGRNRNGSESSEGGK
Sbjct 1361039    DRYNEGERDHSFKPGNHHRPDADKNGDGRNRNGSESSEGGK 1360923

```



**Deide\_09148** protein of unknown function (30aa)

MTRPTARQLQLAMATVLLLLTLLGGALGRLL

Putative CDS directly downstream of *ddrA*.

Potential, non-annotated homologs are present downstream of *ddrA* in *D. radiodurans* and *D. geothermalis*.

```
Deide_09148      ----MTRPTAR-----QLQLAMATVLLLLTLLGGALGRLL
Drad             MTRSLTSAELRGGAPSVDTPVMPARVSPARLPDTPHLGWAMVNLGLLTLLGGALSRLF
Dgeo            ----MSPATPR-----QLAAVMLGVLTLLTLLGGALAKL-
                :: . *                               :* .* : *****.*
```

```
# WEBSEQUENCE Length: 30
# WEBSEQUENCE Number of predicted TMHs: 1
# WEBSEQUENCE Exp number of AAs in TMHs: 18.12642
# WEBSEQUENCE Exp number, first 60 AAs: 18.12642
# WEBSEQUENCE Total prob of N-in: 0.65291
# WEBSEQUENCE POSSIBLE N-term signal sequence
WEBSEQUENCE   TMHMM2.0   outside   1   9
WEBSEQUENCE   TMHMM2.0   TMhelix  10  29
WEBSEQUENCE   TMHMM2.0   inside   30  30
```

**Deide\_11446** protein of unknown function (57aa)

MAAARQDTSMHFHIELAQQRAQDLRQEAQRRLIREAQARKRRKFRFPSSLGHLRLA

Putative CDS, or an ncRNA? Located downstream of, and in opposite direction (convergent) of *uvrC*.

Weak homology with DGo\_CA1576 (55aa) (similarly present downstream and opposite strand of *uvrC*): Identities = 20/41 (48%), Positives = 25/41 (60%).

```
Deide_11446     VAAARQDTSMHFHIELAQQRAQDLRQEAQRRLIREAQARKRR-KFRFPSSLG--HLRLA
DGo_CA1576      ----MNPTFFHFLTFAAQRAADMQRQEAARDRQARAAQPTPLRPTFRWPWTRTRLHPKPA
                :::*.:: :* *** *:*****: * * **, * .**:* * : *
```

```
Deide_11446     VAAARQDTSMHFHIELAQQRAQDLRQEAQRRLIREAQARKRR-KFRFPSSLG--HLRLA
DGo_CA1576      ----MNPTFFHFLTFAAQRAADMQRQEAARDRQARAAQPTPLRPTFRWPWTRTRLHPKPA
ACPL_1607       ----MYP--EINLSLARQRGEQLRQEAAYRRAREA--AGGRPRRRRSVRWPVPRPR--
Mesil_2337      ----MYPNPEMAKKLARERAEAIQQEANQRRLQEAAGLELARPFRRHLAFWLAQLAQL
                . .: :* :*. :**** * : * * : :
```

```
Deide_11446     -----
DGo_CA1576      -----
ACPL_1607       -----PA-
Mesil_2337      DAEVMLKLIKPSR
```

ACPL\_1607 and Mesil\_2337 are not next to *uvrC*

**Deide\_20580** conserved hypothetical protein (83aa)

MRALDTIAESIRIGFVHPTTVMNTLIQVENEGGLGAVRRIERQLHLGTNALRHRDHPNTALAQTWLSAARAYLITQAERRQAV

Located upstream and divergent of *ddrO<sub>c</sub>* (these two genes share the palindromic RDRM). Similar gene pair in others, except *D. radiodurans*.

```

Deide_20580      -----MRALDTIAESIRIGFVHPTTVMNTLIQVENEGGLGAVRRIERQLHLGTNALRHRD
Dgeo_0335       -----MRALDIAESIRVGYVHPTTVMNTLIEAENEGGLGARRIERHLSLGLNALRDRQ
Deipe_1112      -----MRALETTAHTIKIGKVHPTTVMNTLIEVENEGGTGALRRVERHLALSEEALRERA
DGo_CA0309      -----MRALDQIAGSIRAGYVHSTTVLNTLIEETENEGGLNAVRRVERHLDNGMQAMLQRO
Deima_0559      MHTLNQRTLECAETIRTGQAHHTVNTLIEETENQGGSGALRQLERQLSRSADALQTRQ
Deipr_0092      -----MKALTMADSLRAGYIHPHVTNLIELENAGGTAALREFEAHLTSGRQALTERG
Marky_0724      -----MNELLRIAHLKGRVHPNEALNLFIEVDNRAGLEGLHALEEALETALHRLQHRP
Mrub_2304       -----MNVSEIWKSVGRGAAHPSEVLNALLELDNRKGGQIGLWALENELRAKMPLLRPAA
Ocepr_1741      -----MKRIQRLFRTPP--QALPAAMLNLLIEVDNREGRAGLDRLEAEIKAALARLQAG
Mesil_2926      -----MRDNPVWVRSLSGRGKVPSEVLNALLELDNRGMLGLEALEAEINEHLPRLSRA

```

```

.      :      : * : * : * * * . : . * :      :

```

```

Deide_20580      HPNTALAQTWLSAARAYLITQAERRQAV----- 100%
Dgeo_0335       HPHSRLAQTWLGAARAYLVTOAERKQAV----- 78%
Deipe_1112      HPHSRLARAWLDATRAYLVVAHAECKRAV----- 63%
DGo_CA0309      HPRADLVQVWLGATRAYLVSRAEQRQAV----- 63%
Deima_0559      HPHTHVARTWLDATRAYLLVNATRQAV----- 56%
Deipr_0092      HPHARLAEAWLQATRFYLOESQRGAA----- 48%
Marky_0724      HPSTRLLARWLEALRVYRSAAYPSPKTPPPLSKEVRRVAY----- 38%
Mrub_2304       RP---LAQAWLEATVLYRRTTFYSEGRLSRLFHRFVQPEQRPLPFAS 33%
Ocepr_1741      HPQAARLTWLKALEAYRRTYHPRPRWTRFLRRPRAFRRVAPASAR 32%
Mesil_2926      QV---LANAWLEAISAYRAAYYPRSAKIFARIVN-LEQLPKAG 32%

```

```

:      * * *

```

```

Deide_20580      -----MRALDTIAESIRIGFVHPTTVMNTLIQVENEGGLGAVRRIERQLHLGTNALRHRD
Dgeo_0335       -----MRALDIAESIRVGYVHPTTVMNTLIEAENEGGLGARRIERHLSLGLNALRDRQ
Deipe_1112      -----MRALETTAHTIKIGKVHPTTVMNTLIEVENEGGTGALRRVERHLALSEEALRERA
DGo_CA0309      -----MRALDQIAGSIRAGYVHSTTVLNTLIEETENEGGLNAVRRVERHLDNGMQAMLQRO
Deima_0559      MHTLNQRTLECAETIRTGQAHHTVNTLIEETENQGGSGALRQLERQLSRSADALQTRQ
Deipr_0092      -----MKALTMADSLRAGYIHPHVTNLIELENAGGTAALREFEAHLTSGRQALTERG

```

```

: * : * : * * * * * : * * * * * : * * * * * : * * * * *

```

```

Deide_20580      HPNTALAQTWLSAARAYLITQAERRQAV
Dgeo_0335       HPHSRLAQTWLGAARAYLVTOAERKQAV
Deipe_1112      HPHSRLARAWLDATRAYLVVAHAECKRAV
DGo_CA0309      HPRADLVQVWLGATRAYLVSRAEQRQAV
Deima_0559      HPHTHVARTWLDATRAYLLVNATRQAV
Deipr_0092      HPHARLAEAWLQATRFYLOESQRGAA--
**.: :...** *:* **

```

**Deide\_07900** conserved protein of unknown function (63aa)

MSNDKNQPAQSDAPQGGDKDTQGLEGIKQVQDQGMQEKGRQVDQTPQDVTGELDGAQPINRRA

Only homologs in two *Deinococcus*.  
Tblastn indicates homolog in *D. radiodurans* (see below)

```

Deide_07900      MSNDKNQPAQSDA-PQGGDKDTQGLEGIKQVQDQGMQEKGRQVDQTPQDVTGELDGAQPI
Deipr_1284       -MTDQNHQAQGTSPQGGDKDTNSLHDIKDVQKQDMLEKGRQMDQTPESVKDTPDQGGHPQ
DGo_CA1816       --MNDDHQVPGDK-PGGGQKDTNDLSDIKGVQDTGMARKGQVDQDLPKAVTGEMDGSQPQ

```

```

: : : . . : * ** : * * : * * * * * : * * * * * : * * * * * : * * * * *

```

```

Deide_07900      NRRA-
Deipr_1284       QLPRR
DGo_CA1816       NQRR-
:

```

tblastn gives also hit with *D. radiodurans*, but no others

**Features:**

76 bp at 5' side: conserved hypothetical protein  
68 bp at 3' side: hypothetical protein

```

Query 1          MSND-KNQPAQSDAPQGGDKDTQGLEGIKQVQDQGMQEKGRQVDQTPQDVTG 51
MS+D K P      +P+GG KDT L IK +QD GM EK +Q DQTP+ V G
Sbjct 1917919   MSDDAKAMPPEERSPEGGSKDTNDLSDIKGIQDTGMAEKAKQADQTPESVLG 1917764

```

**Deide\_13590** conserved protein of unknown function (77aa)

MSDKSTAENMLDAAAQVNETADRAREAGHNVAHAVTGDAAHKAEALEDRGKAELHNREANAEFHEGKHEATDGDGH

*Deinococcus*-specific

```
Deide_13590 -----MSDKSTAENMLDAAAQVNETADRAREAGHN
Dgeo_1167 -----MPYTGGSPMSEDKSALENMVDAAKAKLQEGVDRARAAAH
DGo_CA1692 -----MQNLADAAKAKINEGADRLRAAGHD
DR_1539 MTLTAGRAPGRTPPLGLPCRSNGNSTSGGQFMSEKTTLDHLADAAGAKLNEVADRARAAGHE
Deipr_0475 -----MSEDKNVLENLADAAAQVNETADRAREAGHN
Deipe_3116 -----MSDQSLGDKLGNAAADVKKHVNAAADRARAEGHD
Deide_13821 -----MTEKSMGERLGEAVDSAKHKVNEMADRTRAEGHE
                      . * . * : * . * * . * :
```

```
Deide_13590 VAHAVT---GDAHKAEALEDRGKAELHNREANAEFHEGKHEATDGDGH-
Dgeo_1167 VASNFG--GTADNLKDKAQAAEDRAKAEVHNAQAHAAYNEGKREAQDGDGH-
DGo_CA1692 VASKVGNHDVNDNAADKVKATEDRARAELHNREAHAEYNEGKRESKDGDDGH-
DR_1539 VAARVSDSPLDTASEKVKAGVDRAKAGIHNAEAHASYDEGHREATDGDGH-
Deipr_0475 VASRDG--LLDNAADKLHEGADRARAANNVDARSSFDKAKDQISDALNGK
Deipe_3116 AKSQTSDNPIESLVEKGAALDRGKAEAHEHQADRARDADR-----
Deide_13821 FKAETS DSPVERAVEK GKATVDH SKAELHEAASEKQARDAGR-----
                      . * . * : * * : : : ..
```

without Deipe\_3116 and Deide\_13821:

```
Deide_13590 -----MSDKSTAENMLDAAAQVNETADRAREAGHN
Dgeo_1167 -----MPYTGGSPMSEDKSALENMVDAAKAKLQEGVDRARAAAH
DGo_CA1692 -----MQNLADAAKAKINEGADRLRAAGHD
DR_1539 MTLTAGRAPGRTPPLGLPCRSNGNSTSGGQFMSEKTTLDHLADAAGAKLNEVADRARAAGHE
Deipr_0475 -----MSEDKNVLENLADAAAQVNETADRAREAGHN
                      : : * * * * : * * . * * * * :
```

```
Deide_13590 VAHAVTG---DAHKAEALEDRGKAELHNREANAEFHEGKHEATDGDGH-
Dgeo_1167 VASNFGG--TADNLKDKAQAAEDRAKAEVHNAQAHAAYNEGKREAQDGDGH-
DGo_CA1692 VASKVGNHDVNDNAADKVKATEDRARAELHNREAHAEYNEGKRESKDGDDGH-
DR_1539 VAARVSDSPLDTASEKVKAGVDRAKAGIHNAEAHASYDEGHREATDGDGH-
Deipr_0475 VASRDGN--LLDNAADKLHEGADRARAANNVDARSSFDKAKDQISDALNGK
** . . * . * * : * * : * : * : : : : * . .
```

**Figure S9. TSS positions relative to RDRM (radiation-desiccation response motif).** For the different radiation-induced genes, the arrows indicate the TSS position relative to the 17-bp RDRM. Either gene names or gene numbers (without “Deide\_”) are shown.

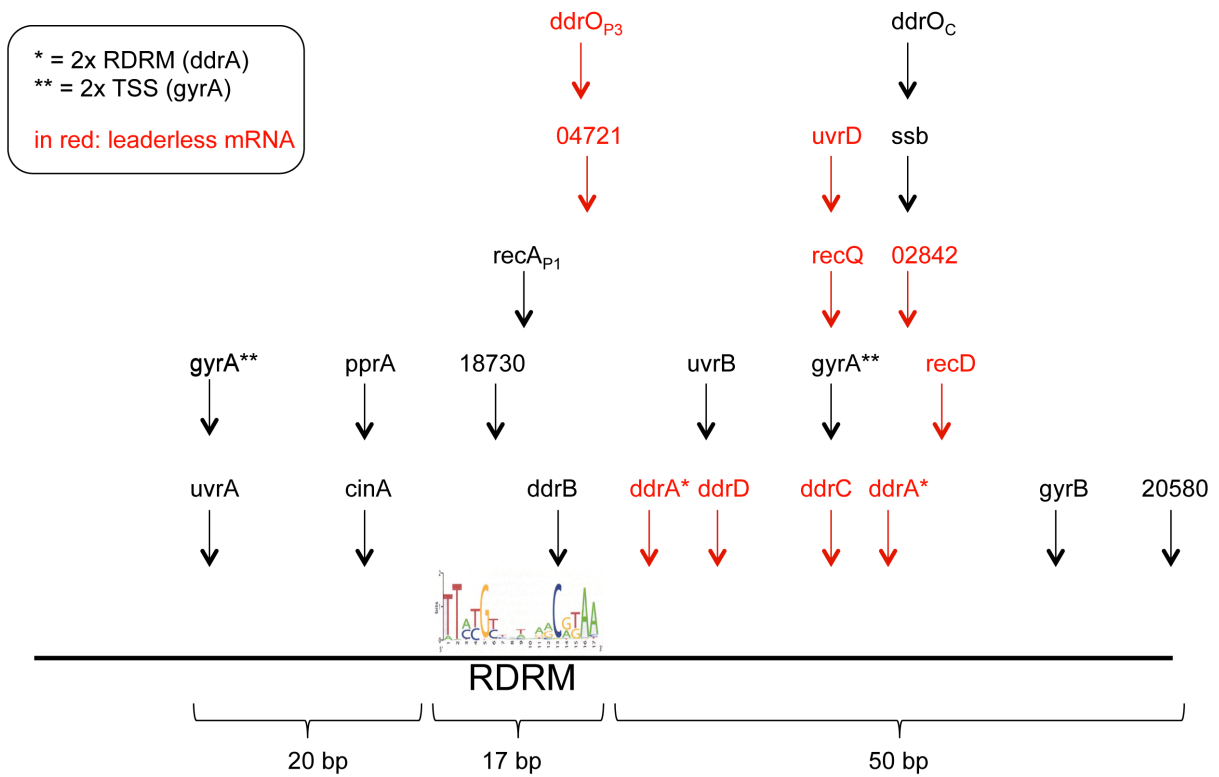

Supplement: supp_evu069_deGroot_SupplementaryFigures.pdf [file supp_evu069_deGroot_SupplementaryFigures.pdf]
